1 **A dense brown trout (*Salmo trutta*) linkage map reveals recent chromosomal**  
2 **rearrangements in the *Salmo* genus and the impact of selection on linked neutral**  
3 **diversity**

4

5 Maeva LEITWEIN<sup>\*</sup>, Bruno GUINAND<sup>\*†</sup>, Juliette POUZADOUX<sup>\*</sup>, Erick DESMARAIS<sup>\*</sup>, Patrick BERREBI<sup>\*</sup>,

6 Pierre-Alexandre GAGNAIRE<sup>\*‡</sup>

7

8 Addresses :

9 <sup>\*</sup>: UMR ISEM, Institut des Sciences de l'Evolution de Montpellier, Université de Montpellier,

10 Place E. Bataillon - cc65, 34095 Montpellier Cedex 5, France

11 <sup>†</sup>: Département Biologie-Ecologie, Université de Montpellier, Place Eugène Bataillon, 34095

12 Montpellier Cedex 5, France

13 <sup>‡</sup>: Station Biologique Marine, 2 Avenue des Chantiers, 34200 Sète, France

14

15 Running title: A dense *Salmo trutta* linkage map

16 Key words: Linkage mapping, *Salmo trutta*, Salmonids, RAD markers, Recombination rate

17

18 Corresponding Author:

19

20 Maeva Leitwein

21 ISEM-Institut des Sciences de l'Evolution

22 UMR5554

23 C.C. 065

24 Place Eugène Bataillon –

25 Université Montpellier

26 34095 Montpellier cedex 05

27 France

28 Tel.: +33 467143725;

29 email: [maeva.leitwein@umontpellier.fr](mailto:maeva.leitwein@umontpellier.fr)

30

31

## ABSTRACT

32 High-density linkage maps are valuable tools for conservation and eco-evolutionary issues. In  
33 salmonids, a complex rediploidization process consecutive to an ancient whole genome  
34 duplication event makes linkage maps of prime importance for investigating the evolutionary  
35 history of chromosome rearrangements. Here, we developed a high-density consensus linkage  
36 map for the brown trout (*Salmo trutta*), a socio-economically important species heavily  
37 impacted by human activities. A total of 3,977 ddRAD markers were mapped and ordered in  
38 40 linkage groups using sex- and lineage-averaged recombination distances obtained from  
39 two family crosses. Performing map comparison between *S. trutta* and its sister species *Salmo*  
40 *salar* revealed extensive chromosomal rearrangements. Strikingly, all of the fusion and fission  
41 events that occurred after the *S. salar/S. trutta* speciation happened in the Atlantic salmon  
42 branch, whereas the brown trout remained closer to the ancestral chromosome structure.  
43 Using the strongly conserved synteny within chromosome arms, we aligned the brown trout  
44 linkage map to the Atlantic salmon genome sequence to estimate the local recombination rate  
45 in *S. trutta* at 3,721 loci. A significant positive correlation between recombination rate and  
46 within-population nucleotide diversity ( $\pi$ ) was found, indicating that selection constrains  
47 variation at linked neutral sites in brown trout. This new high density linkage map provides a  
48 useful genomic resource for future aquaculture, conservation and eco-evolutionary studies in  
49 brown trout.

50

51

## INTRODUCTION

52 A renewed interest for linkage mapping studies has recently occurred thanks to the simplified  
53 procedures for generating large genotype datasets in non-model organisms (Slate *et al.* 2008;  
54 Stapley *et al.* 2010; Ekblom and Galindo 2011). High-density linkage maps have been  
55 particularly developed in teleost fishes, because of their high number of species, their  
56 economic importance for aquaculture (e.g., Sauvage *et al.* 2012; Zhao *et al.* 2013; Wang *et al.*  
57 2015; Liu *et al.* 2016; Kumar and Kocour 2017), their phylogenetic position within  
58 vertebrates (Amores *et al.* 2011; Rondeau *et al.* 2014; Wang *et al.* 2015; Kuang *et al.* 2016),  
59 as well as their broad interests for eco-evolutionary and conservation/management issues  
60 (Everett *et al.* 2012; Gagnaire *et al.* 2013a; Kai *et al.* 2014).

61 The salmonid family, which has 11 genera and more than 60 species (Crête-Lafrenière  
62 *et al.* 2012), is a group of fish in which numerous initiatives have been developed to construct  
63 high-density linkage maps (Brieuc *et al.* 2014; Gonen *et al.* 2014; Limborg *et al.* 2015b;  
64 Larson *et al.* 2016; Tsai *et al.* 2016). Besides their applications for mapping traits of  
65 importance for aquaculture (Houston *et al.* 2012; Sauvage *et al.* 2012; Tsai *et al.* 2015),  
66 salmonid linkage maps have catalysed molecular ecology and genome evolution studies over  
67 the last recent years. Several studies have used linkage map information for addressing eco-  
68 evolutionary and related conservation biology issues at the species level or among hybridizing  
69 taxa (Lamaze *et al.* 2012; Bourret *et al.* 2013; Perrier *et al.* 2013; Gagnaire *et al.* 2013b;  
70 Limborg *et al.* 2014; McKinney *et al.* 2015). A second category of studies have focused on  
71 understanding the evolutionary consequences of the whole genome duplication event  
72 (salmonid-specific fourth vertebrate whole genome duplication; WGD-Ss4R) that occurred  
73 within the salmonid family around 60 Mya ago (Crête-Lafrenière *et al.* 2012), especially with  
74 regards to the partial rediploidization process which is still underway and not totally  
75 understood yet (Berthelot *et al.* 2014; Brieuc *et al.* 2014; Kodama *et al.* 2014; Sutherland *et*

76 *al.* 2016; Allendorf *et al.* 2015; Lien *et al.* 2016). A significantly improved understanding of  
77 this process has been achieved through increased efforts to map and compare chromosomal  
78 rearrangements among species (inversion, translocations, fissions and fusions), which helped  
79 to reconstruct the evolutionary history of salmonids genome architecture (Kodama *et al.* 2014;  
80 Sutherland *et al.* 2016). Furthermore, linkage mapping approaches have also improved the  
81 characterisation of the genomic regions that still exhibit tetrasomic inheritance patterns  
82 (Allendorf *et al.* 2015; Kodama *et al.* 2014; Lien *et al.* 2016; May and Delany 2015; Waples  
83 *et al.* 2016). The partial rediploidization of salmonid genomes is also known to challenge the  
84 development of genome-wide marker data sets. Indeed duplicated loci mostly located in  
85 tetrasomic regions (Allendorf *et al.* 2015) are usually underrepresented or even excluded in  
86 salmonid genomic studies (Hohenlohe *et al.* 2011; Hecht *et al.* 2012; Gagnaire *et al.* 2013b;  
87 Larson *et al.* 2014; Perrier *et al.* 2013; Leitwein *et al.* 2016)

88         The Eurasian brown trout (*Salmo trutta* L. 1758), is one of the most widespread  
89 freshwater species in the northern hemisphere, which presents high levels of phenotypic  
90 diversity linked to its complex evolutionary history (Elliott 1994; Bernatchez and Osinov  
91 1995; Bernatchez, 2001). Natural brown trout populations have been intensely studied using  
92 molecular markers (Hansen *et al.* 2000; Sanz *et al.* 2006; Thaulow *et al.* 2014; Berrebi, 2015;  
93 Leitwein *et al.* 2016), but previous population genetics and phylogeography studies which  
94 usually relied on a limited number of markers did not integrate linkage map information (but  
95 see Hansen and Mensberg 2009; Hansen *et al.* 2010). The microsatellite linkage map  
96 available until now in brown trout (Gharbi *et al.* 2006) contains approximately 300 markers  
97 (288 microsatellites and 13 allozymes), which are distributed over 37 linkage groups (LGs)  
98 among the 40 LGs expected in this species ( $2n=80$ , Martinez *et al.* 1991; Philips and Ráb  
99 2001). In order to follow the tendency towards an increasing number of markers in brown  
100 trout genetic studies (Leitwein *et al.* 2016), a higher density linkage map is needed to increase

101 mapping resolution and provide positional information for genome scans and association  
102 studies. The development of a high-density linkage map in brown trout should find at least  
103 two direct applications.

104 Although the brown trout is the closest relative of the Atlantic salmon (*S. salar* L.  
105 1758), the two species drastically differ in their number of chromosomes (*S. salar*  $2n = 54-58$ ,  
106 Brenna-Hansen *et al.* [2012]; *S. trutta*  $2n = 80$ , Philips and Ráb [2001]), indicative of a high  
107 frequency of chromosome rearrangements. For understanding the chromosomal evolution in  
108 the *Salmo* genus, a comparison between the genome architecture of the Atlantic salmon (Lien  
109 *et al.* 2016) and the brown trout, using other salmonid linkage maps as outgroups, is needed.  
110 The availability of important genomic resources in salmonids coupled with recent  
111 methodological advances in linkage maps comparison (Sutherland *et al.* 2016) provide  
112 favorable conditions to get new insights into the recent history of chromosomal rearrangement  
113 in the *Salmo* genus.

114 Another important application of a high-density linkage map in brown trout relates to  
115 understanding the consequences of human-mediated introductions of foreign and domestic  
116 genotypes in natural populations. The brown trout has been domesticated for decades, and  
117 wild populations have been heavily impacted by the stocking of genetically domesticated  
118 hatchery strains sometimes originating from distinct evolutionary lineages than the recipient  
119 populations (Elliot 1994; Laikre 1999; Berrebi *et al.* 2000; Bohling *et al.* 2016). These  
120 introductions have often resulted in the introgression of foreign alleles within wild brown  
121 trout populations, a generally negatively perceived phenomenon in conservation and  
122 management (Largiadèr and Scholl 1996; Poteaux *et al.* 1998, 1999; Hansen *et al.* 2000;  
123 Almodóvar *et al.* 2006; Sanz *et al.* 2006; Hansen and Mensberg 2009). However, the real  
124 evolutionary consequences of hybridization may take multiple facets (e.g., outbreeding  
125 depression, heterosis, adaptive introgression, decreased adaptive variation), the individual



150 hatchery and independently reared from the Mediterranean strain at the Babeau hatchery. The  
151 Cauterets strain is one of the common, internationally-distributed Atlantic strains (comATL  
152 category; Bohling *et al.* 2016). Crosses were performed in December 2015 at the Babeau  
153 hatchery as follows: FAMILY 1: one Atlantic female  $\times$  one Mediterranean male, and FAMILY 2:  
154 one Atlantic male  $\times$  one Mediterranean female. Progenies were sacrificed in February 2016  
155 after full resorption of the yolk sac (fish size  $\sim$  2cm).

156

### 157 **DNA extraction, library preparation and sequencing**

158 Whole genomic DNA was extracted from caudal fin clips for the four parents of the two  
159 crosses and from tail clips for 150 offspring of each family using the commercial Thermo  
160 Scientific KingFisher Flex Cell and Tissue DNA kit. Individual DNA concentration was  
161 quantified using both NanoDrop ND-8000 spectrophotometer (Thermo Fisher Scientific) and  
162 Qubit 1.0 Fluorometer (Invitrogen, Thermo Fisher Scientific). Double digest RAD sequencing  
163 library preparation was performed following Leitwein *et al.* (2016). Briefly, DNA was  
164 digested with two restriction enzymes (*EcoRI*-HF and *MspI*), the digested genomic DNA was  
165 then ligated to adapters and barcodes. Ligated samples with unique barcodes were pooled in  
166 equimolar proportions and cleanPCR beads (GC Biotech, The Netherlands) were used to  
167 select fragments size between 200 and 700 base pairs (bp). The size selected template was  
168 amplified by PCR and tagged with unique index specifically designed for Illumina sequencing  
169 (Peterson *et al.* 2012). For progenies, PCR products were pooled in equimolar ratios into 4  
170 pools. Each pool was sequenced in a single Illumina HiSeq 2500 lane (i.e. 75 F1 progenies per  
171 lane), producing 125bp paired-end reads. The 4 parents were sequenced in a single Illumina  
172 lane in order to obtain a higher coverage depth.

173



## 174 **Genotyping pipeline**

175 Bioinformatic analyses followed the same procedure as in Leitwein *et al.* (2016). Briefly, raw  
176 reads passing Illumina purity filter and FastQC quality were demultiplexed, cleaned and  
177 trimmed with `process_radtags.pl` implemented in Stacks v1.35 (Catchen *et al.* 2013).  
178 The Atlantic salmon genome (GenBank accession number: GCA\_000233375.4\_ICSASG\_v2)  
179 was used to determine individual genotypes at RAD markers using a reference mapping  
180 approach. First, reads were aligned to *S. salar* genome with the BWA-mem program (Li and  
181 Durbin, 2010). Alignment result files were processed into `pstacks` to build loci and call  
182 haplotypes for each individuals (using  $m = 3$  and  $\alpha = 0.05$ ). Individuals with a minimum  
183 mean coverage depth under 7X were removed, resulting in a data set of 147 offspring in  
184 FAMILY 1 and 149 offspring in FAMILY 2. Hereafter, a RAD locus is defined as a sequence of  
185 120bp, and thus can contain more than one SNP defining different haplotypes. A reference  
186 catalog of RAD loci was built with `cstacks` from the four parents of the two crosses  
187 (FAMILY 1 and FAMILY 2). Each individual offspring and each parent were then matched  
188 against the catalog with `sstacks`. Then, for each family independently, the module  
189 `genotypes` was executed to identify mappable makers that were genotyped in at least 130  
190 offspring in each family, and with a minimum sequencing depth of 5 reads per allele. The  
191 correction option (-c) in the `genotypes` module was used for automated correction of false-  
192 negative heterozygote calls. The map type “cross CP” for heterogeneously heterozygous  
193 populations was selected to export haplotypic genotypes in the JoinMap 4.0 format (Van  
194 Ooijen, 2006). We only kept the loci shared between FAMILY 1 and FAMILY 2, for importation  
195 into JoinMap, leaving a total of 7680 mappable loci in both families.

196

## 197 **Linkage mapping**

198 Both family data sets were imported and filtered into JoinMap 4.0 (Van Ooijen, 2006) to  
199 remove (i) loci presenting significant segregation distortion, (ii) loci in perfect linkage (i.e.,  
200 similarity of loci = 1), and (iii) individuals with high rates of missing genotypes (>25%).  
201 After this first filtering step, 5,635 and 5,031 loci remained in FAMILY 1 and FAMILY 2  
202 respectively. Only those that were shared by the two families were kept, resulting in a subset  
203 of 4,270 filtered informative loci. A random subset of 4,000 loci for both FAMILY 1 and  
204 FAMILY 2 were reloaded into JoinMap 4.0 (i.e., the maximum number of loci handled by the  
205 program). We then discarded 4 offspring in FAMILY 1 and 6 offspring in FAMILY 2 due to high  
206 rates of missing genotypes (above 20%). Markers were then grouped independently within  
207 each family using the “independence LOD” parameter in JoinMap 4.0 with a minimum LOD  
208 value of 10. Unassigned markers were secondly assigned using the strongest cross-linkage  
209 option with a LOD threshold of 5. Marker ordering was finally estimated within each group  
210 using the regression mapping algorithm and three rounds of ordering. The Kosambi’s  
211 mapping function was used to estimate genetic distances between markers in centimorgans  
212 (cM). Loci with undetermined linkage were then removed, and a consensus map was  
213 produced between families using the map integration function after identifying homologous  
214 LGs between FAMILY 1 and FAMILY 2.

215

## 216 **Estimation of centromere location and chromosome type**

217 The method recently developed by Limborg *et al.* (2015a) was used to identify chromosome  
218 types (acrocentric, metacentric) and to determine the approximate centromere position of  
219 metacentric chromosomes. This method uses phased progeny’s genotypes to detect individual  
220 recombination events by comparison to parental haplotype combinations. For each LG, the  
221 cumulated number of recombination events between the first marker and increasingly distant  
222 markers was computed from both extremities, using each terminal marker as a reference

223 starting point. We used the subset of markers that were found heterozygous only in the female  
224 parent to phase progeny's haplotypes within each family. We only focused on female  
225 informative sites because the lower recombination rate in male salmonids makes them less  
226 adequate for inferring centromere locations (Limborg *et al.* 2015a). Lower recombination in  
227 male brown trout was reported by Gharbi *et al.* (2006). The phased genotypes data sets were  
228 used to estimate recombination frequency (RFm) for intervals between markers along each  
229 LG. Finally, we plotted the RFm calculated from each LG extremity to determine the  
230 chromosome type and the approximate location of the centromere for metacentric  
231 chromosomes.

232

### 233 **Map comparisons**

234 The microsatellite linkage map established by Gharbi *et al.* (2006) was compared and  
235 anchored to our new high density linkage map using the MAPCOMP pipeline available at  
236 <https://github.com/enormandeu/mapcomp/> (Sutherland *et al.* 2016). The microsatellite  
237 markers' primer sequences retrieved from Gharbi *et al.* (2006), as well as the five  
238 microsatellites used in Leitwein *et al.* (2016) and the lactate dehydrogenase (LDH-C1) gene  
239 from McMeel *et al.* (2001) were aligned with BWA\_a1n (Li and Durbin 2010) to the Atlantic  
240 salmon reference genome. Only single hit markers with a quality score (MAPQ) above 10  
241 were retained. The 3,977 RAD markers integrated in the high density *S. trutta* linkage map  
242 (see results) were also aligned to the *S. salar* reference genome with BWA\_mem. Microsatellite  
243 and LDH markers were anchored onto the RAD linkage map by identifying the closest RAD  
244 locus located on the same contig or scaffold. Pairing with closely linked RAD markers  
245 enabled us to position markers from the previous generation map onto the newly developed  
246 linkage map.

247

248 An additional comparison was performed between the *S. salar* high density linkage map  
249 published by Tsai *et al.* (2016), and the *S. trutta* consensus linkage map developed in this  
250 study. We used the alignment of Atlantic salmon and brown trout markers to the Atlantic  
251 salmon reference genome obtained with Bwa\_mem (Li and Durbin 2010) to identify loci  
252 originating from orthologous genomic regions, and then used these loci in MAPCOMP  
253 (Sutherland *et al.* 2016) to identify blocks of conserved synteny and orthologous chromosome  
254 arms between the two species' maps. Conserved synteny blocks were visualized with the  
255 web-based VGSC (Vector Graph toolkit of genome Synteny and Collinearity:  
256 <http://bio.njfu.edu.cn/vgsc-web/>). The brook charr (*Salvelinus fontinalis*) linkage map  
257 published in Sutherland *et al.* (2016) was used as one outgroup to provide orientation for  
258 chromosome rearrangements during evolution of the *Salmo* lineage.

259 In order to estimate the genome-wide averaged net nucleotide divergence between *S. trutta*  
260 and *S. salar* ( $d_a$ ), we used the mean nucleotide diversity within *S. trutta* ( $\pi_w$ , averaged  
261 between Atlantic and Mediterranean lineages) (Leitwein *et al.* 2016) and the absolute  
262 nucleotide divergence between *S. trutta* and *S. salar* ( $\pi_b$ , also called  $d_{xy}$ ). The net divergence  
263 was estimated as  $d_a = \pi_b - \pi_w$ , by supposing that the mean nucleotide diversity in *S. salar*  
264 (which is not available) was close to the mean nucleotide diversity estimated in *S. trutta*. To  
265 estimate  $\pi_b$ , we used the 3,977 consensus sequences of the RAD loci integrated in our *S. trutta*  
266 linkage map, and aligned them with BWA\_mem to the Atlantic salmon reference genome.  
267 Then, the total number of mismatches divided by the total number of mapped nucleotides was  
268 used to provide an estimate of  $\pi_b$ .

269

## 270 **Estimation of genome-wide recombination rates**

271 To estimate local variation in recombination rate across the genome, we compared our newly  
272 constructed genetic map of *S. trutta* to the physical map of *S. salar* with MAREYMAP (Rezvoy  
273 *et al.* 2007). In order to reconstruct a collinear reference genome for each brown trout linkage  
274 group, physical positions of brown trout RAD markers on the salmon genome were extracted  
275 from the BWA\_mem alignment for each block of conserved synteny previously identified with  
276 MAPCOMP. The Loess method was used to estimate local recombination rates. It performs a  
277 local polynomial regression to fit the relationship between the physical and the genetic  
278 distances. The window size, defined as the percentage of the total number of markers to take  
279 into account for fitting the local polynomial curve, was set to 0.9 to account for local  
280 uncertainties due to the high rate of chromosomal rearrangements between species. A  
281 recombination rate equal to the weighted mean recombination rate of the two closest markers  
282 on the genetic map was assigned to the markers that were not used for fitting.

283

## 284 **Correlation between recombination rate and nucleotide diversity**

285 In order to test for a correlation between local recombination rate and nucleotide diversity in  
286 brown trout, we used the estimate of nucleotide diversity ( $\pi$ ) in the Atlantic lineage (based on  
287 20 individuals). These estimates of nucleotide diversity were taken from Leitwein *et al.*  
288 (2016), in which brown trout populations and hatchery strains of different origins showed  
289 highly correlated genome-wide variation patterns in nucleotide diversity. Markers with a  
290 recombination rate value above 2 cM/Mb or  $\pi < 0.008$  were considered as outliers and were  
291 therefore removed from the analysis. This resulted in a dataset containing 3,038 markers for  
292 which both recombination rate and nucleotide diversity information were available.

## 293 **Data availability**

294 Table S1 contains the RAD markers IDs, the consensus sequences, the mapping position on  
295 the brown trout linkage map along with the position on the salmon genome and the estimation  
296 of the recombination rate. Figure S1 contains the RFm plots obtained for each female haploid  
297 data set. Table S2 contains the correspondence between the microsatellite and the new RAD  
298 linkage map. Figure S2 contains the MapComp figure comparing the Brown trout to the  
299 Atlantic salmon linkage map with markers paired through the Atlantic salmon genome.

300

301

## RESULTS

302

### 303 **Construction of a high-density linkage map in *Salmo trutta***

304 On average, 35M of filtered paired-end (PE) reads were obtained for each of the four parents  
305 (two families), and 5M PE reads for each of the 300 F1 (150 progenies per family) analyzed  
306 in this study. Therefore, the retained subset of 7,680 informative markers common to both  
307 families had a mean individual sequencing depth of 112X for the parents and 15X for the  
308 progenies, ensuring a good genotype calling quality in both families. Among these, a subset of  
309 4,000 markers showing no segregation distortion in both families was randomly retained, to  
310 generate a consensus map between families 1 and 2. The resulting integrated map provides a  
311 sex- and lineage-averaged map, which is an important feature considering the reported  
312 differences in recombination rates between male and female in salmonids (Allendorf *et al.*  
313 2015; Tsai *et al.* 2015), and the existence of divergent geographic lineages in brown trout  
314 (Bernatchez 2001).

315 A total of 3,977 markers were assigned to 40 *S. trutta* (*Str*) LGs on the integrated map (Figure  
316 1), corresponding to the expected number of chromosomes in brown trout (Phillips and Ráb,  
317 2001). The total map length was 1,403 cM, and individual LGs ranged from 14.6 cM (*Str*3; 47

318 markers) to 84.9 cM (*Str37*; 63 markers). The number of markers per LG ranged from 23 for  
319 *Str40* (15.2 cM) to 252 for *Str1* (46.3 cM). Detailed information for each LG including the  
320 density of markers per cM is reported in Table 1. Additional details concerning RAD markers  
321 IDs, consensus sequences and mapping position on the salmon genome are reported in Table  
322 S1.

323

### 324 **Location of centromeres and chromosome types**

325 The estimates of recombination frequencies obtained using the phased genotypes of female  
326 progeny produced similar results for both FAMILY 1 and FAMILY 2. Individual linkage group  
327 RFm plots obtained for each female haploid data set are provided in Figure S1. Two examples  
328 of RFm plots obtained in FAMILY 1 are reported in Figure 2 for *Str22* and *Str28*. Following  
329 Limborg *et al.* (2015a), the pattern observed for *Str22* typically reflects an acrocentric  
330 chromosome type (paired straight lines; Figure 2a), whereas *Str28* illustrates a metacentric  
331 pattern (mirrored hockey stick shapes; Figure 2b) with the centromere approximately located  
332 around 70cM. The total number of probable acrocentric chromosomes (Figure 1; type A,  $n =$   
333 32) largely exceeded the number of metacentric chromosomes (Figure 1; type M,  $n = 3$ ). The  
334 approximate position of the centromere was determined for each of the three metacentric LGs  
335 (Figure 1; green boxes). The chromosome type remained undetermined for five LGs (Figure  
336 1; type U) due to a low resolution of the RFm plots (Figure S1).

337

### 338 **Linkage map comparisons**

339 A total of 87 microsatellites markers (82/160 from Gharbi *et al.* [2006], 5/5 from Leitwein *et*  
340 *al.* [2016] and the LDH locus [McMeel *et al.* 2001]) were successfully mapped to the Atlantic  
341 salmon genome, and anchored to the new brown trout linkage map using their pairing with

342 RAD markers, following the method developed in Sutherland *et al.* (2016) (Figure 1; red  
343 dots). The correspondence between the microsatellite and the new RAD linkage map is  
344 provided in Table S2.

345 The identification of orthologous chromosomes arms between *S. trutta* (40LGs) and *S. salar*  
346 (29LGs) revealed frequent chromosomal rearrangements between the two species (Figure 3,  
347 Table 1). We found 15 one-to-one ortholog pairs (e.g., *Ssa6-Str5*, *Ssa28-Str14*; Figure 3,  
348 Table 1), 12 cases where salmon chromosomes correspond to either 2 or 3 LG in the brown  
349 trout (e.g., *Ssa1*, *Ssa2*; Figure 3), and only two cases where brown trout LGs correspond to  
350 two salmon chromosomes (*Str1* and *Str15*; Figure 3). Local inversions between *S. salar* and *S.*  
351 *trutta* genomes were also observed as for instance *S. salar* LG6 and *S. trutta* LG5 (Figure S2).  
352 Apart from these inter- and intra-chromosomal rearrangements, a strongly conserved synteny  
353 was observed between the brown trout and the Atlantic salmon genomes.

354 Comparison with the brook charr linkage map revealed orthologous genomic regions with the  
355 brown trout and the Atlantic salmon (Table 1), thus allowing for the identification of ancestral  
356 and derived chromosomes structures in the *Salmo* genus. We found 8 chromosomal  
357 rearrangements that occurred in the ancestral lineage of the *Salmo* genus before speciation  
358 between *S. trutta* and *S. salar*, including 5 events of fusions (e.g., *Sfon31-Sfon14*, Table 1 and  
359 2) and 3 events of fission (e.g., *Sfon08*; Table 1 and Figure 4). While no rearrangement was  
360 detected in the *S. trutta* branch, the Atlantic salmon branch contained 13 events of fusion and  
361 2 events of fission (Figure 4). Among these fusion events, note that *Str17* and *Str39* are  
362 related to *Ssa15*, which was previously suspected to effectively be the result of a fusion  
363 (Phillips *et al.* 2009), but which is also known to host *SdY*, the male-determining system of  
364 the Atlantic salmon (Li *et al.* 2011) and most salmonids (Yano *et al.* 2013). As the  
365 microsatellite locus *OmyRT5TUF* was consistently shown to be linked to the *SdY* locus in the  
366 brown trout (Gharbi *et al.* 2006; Li *et al.* 2011), it may indicate that LG *Str39* could support



367 the male determining system of brown trout as the *OmyRT5TUF* locus was detected on this  
368 LG (Table S2). This has to be investigated further.

369 We estimated the average net nucleotide divergence between *S. trutta* and *S. salar* to  $d_a =$   
370 0.0187 (with  $\pi_b = 0.0228$ , and  $\pi_w = 0.0041$ ).

371

### 372 **Estimations of genome-wide and local recombination rates**

373 The brown trout genome-wide recombination rate averaged across the 3,721 markers  
374 anchored on the Atlantic salmon reference genome (RAD markers mapped to ungrouped  
375 scaffolds were discarded), was estimated at  $0.88 \pm 0.55$  cM/Mb, and ranged from 0.21 cM/Mb  
376 (LG27) to 4.10 (LG 37) across linkage groups (Table 1, Table S1). Chromosomal variation in  
377 local recombination rate was observed for most chromosomes (e.g., LG *str9* and LG *str23*,  
378 Figure 5). A significant positive correlation between local recombination rate and population  
379 nucleotide diversity was detected ( $R^2 = 0.058$ ;  $p$ -value  $< 0.001$ ; Figure 6).

380

381

## DISCUSSION

382 This study describes the first high density linkage map in the brown trout *Salmo trutta*,  
383 which extends the microsatellite linkage map already available in this species (Gharbi *et al.*  
384 2006). The map covered 1,403 cM and encompasses 3,977 non-distorted markers distributed  
385 across 40 linkage groups for which their centromere location was determined. Results showed  
386 consistent chromosome number and morphologies compared to the species' karyotype  
387 ( $2n=80$ ,  $NF=100$ ; Phillips and Ráb 2001). High resolution mapping (3.15 markers per cM)  
388 was insured by the use of two mapping families each containing 150 offspring, and the  
389 number of markers informative in both families was close to the limit over which saturation is

390 expected (i.e., 4,200 markers). The homogeneous distribution of makers across the genome,  
391 and the estimation of averaged recombination distances between both evolutionary lineages  
392 and sexes provide a highly valuable resource for future genomic, aquaculture, conservation  
393 and eco-evolutionary studies in brown trout. Beyond these general interests, this new linkage  
394 map also reveals strikingly different rates of chromosomal rearrangements that happened  
395 between the brown trout and the Atlantic salmon since their recent divergence.

#### 396 *A new-generation RAD linkage map in brown trout*

397       Comparison between the newly developed linkage map and the previous microsatellite  
398 map was made possible by the integration of 82 microsatellite markers from the former  
399 generation map (Gharbi *et al.* 2006). This enabled us to identify the correspondence between  
400 homologous LGs from the two maps, and to detect cases of LG merging (8/40) and LG  
401 splitting (9/40) in the microsatellite map compared to the RAD linkage map. Consistent with  
402 the reported overrepresentation of acrocentric compared to metacentric chromosome found in  
403 the brook charr (i.e., 8 metacentric and 34 acrocentric [Sutherland *et al.* 2016]), we found  
404 three metacentric morphologies against 32 acrocentric. This represents a total number of  
405 chromosome arms ranging from 86 to 96, which is lower but quite close to the 96-104 interval  
406 previously estimated in *S. trutta* (Martinez *et al.* 1991; Phillips and Ráb 2001). Our  
407 assessment of chromosome type did not perfectly match the results from Gharbi *et al.* (2006),  
408 since the three metacentric chromosomes identified here were found to be either acrocentric  
409 or undetermined in their study. However, the metacentric chromosomes *Str2* and *Str5*  
410 identified here had more than a single matching LG in the former microsatellite map, which  
411 suggests that these homologs represent the two telomeric regions of a larger metacentric  
412 linkage group which has been reconstructed in our study. On the contrary, the three  
413 metacentric chromosomes identified in Gharbi *et al.* (2006) appeared to be acrocentric using  
414 the phase information available from our dataset. This could be the consequence of

415 pseudolinkage in the microsatellite map built using males of hybrid origin, in which the  
416 preferential pairing of conspecific homeologs followed by alternate disjunction may have  
417 generated an excess of non-parental gametes (Morrison 1970; Wright *et al.* 1983; Allendorf  
418 *et al.* 2015). In our study, the possible effect of pseudolinkage was avoided by using non-  
419 hybrid parents with a single lineage ancestry, thus possibly explaining the observed  
420 differences with the previous generation map.

421 Besides pseudolinkage, another broader consequence of past WGD in salmonids is the  
422 existence of duplicated loci that share the same alleles due to homeologous recombination in  
423 telomeric regions (Wright *et al.* 1983; Allendorf and Danzmann 1997; Allendorf *et al.*  
424 2015). These residual tetrasomic regions challenge traditional linkage map reconstruction  
425 methods since duplicated loci (isoloci) tend to show Mendelian segregation distortion, and are  
426 therefore frequently excluded from linkage mapping analyses. Alternative approaches can be  
427 used to detect homeologous regions in experimental crosses (Lien *et al.* 2011; Brieuc *et al.*  
428 2014; Waples *et al.* 2015). In brown trout, genome-wide patterns of RAD markers density  
429 and nucleotide diversity projected on the Atlantic salmon reference genome were also shown  
430 to provide indications about the location of duplicated regions (Leitwein *et al.* 2016). Although  
431 our new RAD linkage map is based on non-distorted markers and therefore probably displays  
432 a reduced marker density in regions exhibiting tetrasomic inheritance, it does not completely  
433 exclude such regions. This is illustrated by the mapping of multiple RAD loci within the  
434 seven pairs of homeologs chromosome arms that retain residual tetrasomy in the Atlantic  
435 salmon genome (Lien *et al.* 2016) (Figure 3). Except for 3 of these 14 regions that received  
436 relatively few markers (*Ssa3q*, *Ssa11qa*, *Ssa17qa* on the salmon map; Figure 3), the remaining  
437 arms were well covered in our RAD linkage map, indicating that the filtering of non-  
438 Mendelian markers did not completely exclude the telomeric regions affected by  
439 homeologous crossovers. This feature of our RAD linkage map should insure a more even

440 recombination rate estimation between sexes (Lien *et al.* 2011), since the commonly  
441 observed lower recombination rate in males compared to females in salmonids could be partly  
442 due to a poor characterization of telomeric regions in mapping studies (Allendorf *et al.* 2015).  
443 Thus, our final sex-averaged linkage map should not be affected by the integration of  
444 recombinational information from male meiosis, while providing at the same time more  
445 relevant estimates of recombination distances for future eco-evolutionary studies.

446         Following the same idea, integrating maps between parents of different lineage  
447 origins (Atlantic and Mediterranean) allowed us to generate a consensus linkage map in which  
448 the potential differences in recombination rates between these two allopatric lineages are  
449 smoothed. This is important for future conservation genomic studies, considering the  
450 extensive human-mediated admixture between Atlantic and Mediterranean brown trout  
451 populations in southern Europe (Berrebi *et al.* 2000; Sanz *et al.* 2006; Thaulow *et al.* 2014;  
452 Berrebi, 2015).

#### 453 *The recent evolution of chromosomal rearrangements in the Salmo genus*

454         Salmonids are still undergoing a rediploidization process since a WGD event that  
455 occurred around 60 Mya (Crête-Lafrenière *et al.* 2012; Near *et al.* 2012; Macqueen and  
456 Johnston 2014; Lien *et al.* 2016). This process, also described as functional diploidization by  
457 Ohno (1970), was accompanied by numerous chromosomal rearrangements within the  
458 salmonid family, making linkage maps of prime importance for studying the complex history  
459 of chromosomal evolution in salmonids (Sutherland *et al.* 2016). Several studies have pointed  
460 out a particularly high number of chromosome rearrangements in the lineage leading to the  
461 Atlantic salmon, involving mainly chromosome fusions that reduced the number of  
462 chromosomes to 29 in this species (Allendorf and Thorgaard 1984; Lien *et al.* 2016;  
463 Sutherland *et al.* 2016). However, the timing of these rearrangements remains largely  
464 unknown due to the lack of a closely related species in previous studies. Because *S. trutta* is

465 the most closely related species to *S. salar* among salmonids, the new brown trout RAD  
466 linkage map allowed for inferring the phylogenetic positions of the chromosome arm  
467 rearrangements that occurred within the *Salmo* genus. The ancestral state of *Salmo*  
468 chromosome structure was further resolved using the brook charr as an outgroup, as well as  
469 other salmonid species when necessary (Sutherland *et al.* 2016). This enabled us to identify 5  
470 fusion events (e.g., *Sfon31-Sfon14*, Table 1) and 3 fission events (e.g., *Sfon08a* and *b*, Table1)  
471 that occurred before the Atlantic salmon/brown trout speciation. Thus, most fissions and  
472 fusion events observed in the Atlantic salmon genome (Sutherland *et al.* 2016), specifically  
473 occurred after the divergence between the two *Salmo* species. The net nucleotide divergence  
474 between *S. salar* and *S. trutta* was estimated to 1.87%, which indicates a recent divergence  
475 time between these two sister species (i.e., less than 5 My). This estimate of nucleotide  
476 divergence should be compared to the previously reported estimate by Bernatchez *et al.*  
477 (1992) that was approx. 6%. It also probably challenges the >10My divergence time between  
478 *S. salar* and *S. trutta* reported in Crête-Lafrenière *et al.* (2012), and this point should be  
479 investigated further. Whatever the timing of divergence, all of the inter-chromosomal  
480 rearrangements that occurred after the salmon/trout speciation happened in *S. salar*. Indeed,  
481 we did not observe any fusion/fission event within the *S. trutta* branch (Figure 4), whereas 15  
482 rearrangements mostly involving fusions (13 fusions and 2 fissions) specifically occurred in  
483 the Atlantic salmon branch. These Robertsonian translocations explain the increased number  
484 of metacentric chromosomes in the Atlantic salmon compared to the brown trout, which were  
485 produced by the recent fusion of acrocentric chromosomes (*Ssa1* to *Ssa4*; Figure 3 and Table  
486 1). However, fusion events could also result in the formation of acrocentric chromosomes in  
487 the Atlantic salmon (e.g., *Ssa15*; Figure 3 and Table1), thus explaining the apparent loss of  
488 chromosomes arms (Allendorf and Thorgaard 1984). Finally, intra-chromosomal  
489 rearrangements also occurred along the *S. salar* branch, such as, e.g., the inversion detected

490 within *Ssa6* and *Str5* (Figure 3 and Figure S2). Altogether, these result support the previous  
491 views that many chromosomal rearrangements have occurred within the *Salmo* lineage  
492 (Allendorf and Thorgaard 1984; Sutherland *et al.* 2016), but demonstrate that most of them  
493 recently happened in the Atlantic salmon branch while at the same time *S. trutta* has retained  
494 a chromosomal architecture close to the ancestral salmonid form. The reasons for such a  
495 contrasted evolution of chromosome structure between these two species remain to be  
496 investigated. The fact that natural, viable hybrids occur between *Salmo* species (e.g., Jones,  
497 1947; Garcia de Léaniz and Verspoor 1989) indicate that rearrangements have relatively poor  
498 consequences during meiosis, and in early life phases.

499 .

#### 500 *Recombination rate variation across the brown trout genome*

501 Despite extensive chromosomal rearrangements in the *S. salar* lineage, we could identify  
502 highly conserved synteny blocks within orthologous chromosome arms to reconstitute local  
503 alignments between the brown trout linkage map and the salmon physical map. One of our  
504 main objectives was to use these comparisons between maps to estimate local recombination  
505 rate variations along each linkage group in *S. trutta* (Figure 5). The average genome-wide  
506 recombination rate was estimated at 0.88 cM/Mb, however, with strong heterogeneity being  
507 found across the genome. High recombination rate regions were observed at extremities of  
508 some LGs (e.g., *Str9*; Figure 5), and genomic regions associated with very low recombination  
509 rates were also observed (e.g., *Str23*; Figure 5). In order to provide an indirect assessment of  
510 this local recombination rate estimation, for future eco-evolutionary studies, we verified that  
511 the frequently observed positive correlation between local recombination rate and nucleotide  
512 diversity (Corbett-Detig *et al.* 2015) also occurs in brown trout. In a comparative study across  
513 a wide range of species, Corbett-Detig *et al.* (2015) showed that the strength of this  
514 correlation is highly variable among species, being generally stronger in species with large *vs*

515 small census population size. Although brown trout populations are usually considered to  
516 have relatively small census sizes (Jorde and Ryman 1996; Palm *et al.* 2003; Jensen *et al.*  
517 2005; Serbezov *et al.* 2012), a significantly positive correlation was found between local  
518 recombination rate and nucleotide diversity using polymorphism data from the Atlantic  
519 lineage. Thus, recombination rate variation across the brown trout genome shapes the  
520 chromosomal landscape of neutral genetic diversity by modulating the efficiency of selection  
521 (both positive and negative) at linked neutral sites.

522         Variation in local recombination rate across genomic regions not only affects genome-  
523 wide variation patterns of polymorphism, but also has profound influence on a range of  
524 evolutionary mechanisms of prime importance for eco-evolutionary studies in brown trout.  
525 This recombination map should therefore have beneficial outcomes for our understanding of  
526 inbreeding depression, local adaptation, and the historical demography of natural populations  
527 (Rezvory *et al.* 2007; Dukić *et al.* 2016; Racimo *et al.* 2015). It will also be of precious help  
528 for understanding genome-wide introgression patterns in natural populations that have been  
529 restocked with individuals from a different lineage. Finally, a detailed picture of  
530 recombination rate variation in brown trout will help for choosing SNPs for the design of  
531 genotyping arrays in future association mapping experiments (e.g., Bourret *et al.* 2013;  
532 Houston *et al.* 2014).

### 533 *Conclusion*

534 A high density sex- and lineage-averaged consensus linkage map for *S. trutta* was developed  
535 and the chromosome type (acrocentric or metacentric) of most linkage groups was identified.  
536 Interspecies comparisons with the Atlantic salmon allowed identifying genomic regions of  
537 highly conserved synteny within chromosome arms and contribute towards a better  
538 understanding of recent genome evolution following speciation in the genus *Salmo*. A recent  
539 and strong acceleration in the rate of chromosomal rearrangements was detected in the *S.*

540 *salar* branch. These results should stimulate further research toward understanding the  
541 contrasted evolution of chromosome structure in sister species with less than 2% net  
542 nucleotide divergence. Recombination rate variation was found to influence genome-wide  
543 nucleotide diversity patterns in brown trout. These new genomic resources will provide  
544 important tools for future genome scans, QTL mapping and genome-wide association studies  
545 in brown trout. It also paves the way for a new generation of conservation genomics  
546 approaches that will look at the fitness consequences of introgression of foreign alleles into  
547 wild populations at the haplotype level.

548

549

#### ACKNOWLEDGEMENTS

550 Authors wish to thanks E. Ravel and people from the Fédération Départementale de la Pêche  
551 de l'Hérault (France) and of the Babeau hatchery for their help at several steps of this project.  
552 We would like to thanks Y. Anselmetti for his kind advice on bioinformatics computing.  
553 Many thanks to M. Limborg for his helpful scripts and advice in particular for the centromere  
554 location. We thanks B. Sutherland for his suggestions with MapComp. This project largely  
555 benefited from the Montpellier Bioinformatics Biodiversity cluster computing platform. Pre-  
556 sequencing steps necessary to the production of SNP data were performed at the Genotyping  
557 and Sequencing facility of the LabEx CeMEB (Centre Méditerranéen pour l'Environnement  
558 et la Biodiversité, Montpellier), and RAD sequencing performed at MGX (Montpellier  
559 GenomiX facility, Montpellier, France, <http://www.mgx.cnrs.fr/>). ML was partly supported  
560 by a grant of the LabEx CeMEB.

561

562 **REFERENCES**



- 563 Allendorf, F.W., S. Bassham, W.A. Cresko, M.T. Limborg, L.W. Seeb, and J.E. Seeb 2015  
564 Effects of Crossovers Between Homeologs on Inheritance and Population Genomics  
565 in Polyploid-Derived Salmonid Fishes. *J Hered* esv015.
- 566 Allendorf, F.W., and G.H. Thorgaard, 1984 Tetraploidy and the Evolution of Salmonid  
567 Fishes, in: Turner, B.J. (Ed.), *Evolutionary Genetics of Fishes*, Monographs in  
568 *Evolutionary Biology*. Springer US. 1: 1–53.
- 569 Almodóvar, A., G.G. Nicola, B. Elvira, and J.L. García-Marin, 2006 Introgression variability  
570 among Iberian brown trout Evolutionary Significant Units: the influence of local  
571 management and environmental features. *Freshwater Biology* 51: 1175–1187.
- 572 Amores, A., J. Catchen, A. Ferrara, Q. Fontenot, J.H Postlethwait, 2011 Genome Evolution  
573 and Meiotic Maps by Massively Parallel DNA Sequencing: Spotted Gar, an Outgroup  
574 for the Teleost Genome Duplication. *Genetics* 188: 799–808.
- 575 Bernatchez, L., 2001 The evolutionary history of brown trout (*Salmo trutta* L.) inferred from  
576 phylogeographic, nested clade, and mismatch analyses of mitochondrial DNA  
577 variation. *Evolution* 55: 351–379.
- 578 Bernatchez, L., R. Guyomard, and F. Bonhomme, 1992 DNA sequence variation of the  
579 mitochondrial control region among geographically and morphologically remote  
580 European brown trout *Salmo trutta* populations. *Molecular Ecology* 1: 161–173.
- 581 Bernatchez, L., and A. Osinov, 1995 Genetic diversity of trout (genus *Salmo*) from its most  
582 eastern native range based on mitochondrial DNA and nuclear gene variation.  
583 *Molecular Ecology* 4: 285–298.
- 584 Berrebi, P., 2015 Three brown trout *Salmo trutta* lineages in Corsica described through  
585 allozyme variation. *Journal of fish biology* 86: 60–73.

- 586 Berrebi, P., C. Poteaux, M. Fissier, and G. Cattaneo-Berrebi, 2000 Stocking impact and  
587 allozyme diversity in brown trout from Mediterranean southern France. *Journal of*  
588 *Fish Biology* 56: 949–960.
- 589 Berthelot, C., F. Brunet, D. Chalopin, A. Juanchich, M. Bernard, *et al.*, 2014 The rainbow  
590 trout genome provides novel insights into evolution after whole-genome duplication in  
591 vertebrates. *Nature communications* 5.
- 592 Bohling, J., P. Haffray, and P. Berrebi, 2016 Genetic diversity and population structure of  
593 domestic brown trout (*Salmo trutta*) in France. *Aquaculture* 462: 1–9.
- 594 Bourret, V., M.P. Kent, C.R. Primmer, A. Vasemägi, S. Karlsson, *et al.*, 2013 SNP-array  
595 reveals genome-wide patterns of geographical and potential adaptive divergence  
596 across the natural range of Atlantic salmon (*Salmo salar*). *Molecular ecology* 22: 532–  
597 551.
- 598 Briec, M.S., C.D. Waters, J.E. Seeb, and K.A. Naish, 2014 A dense linkage map for Chinook  
599 salmon (*Oncorhynchus tshawytscha*) reveals variable chromosomal divergence after  
600 an ancestral whole genome duplication event. *G3*. 4: 447–460.
- 601 Catchen, J., P.A Hohenlohe, S. Bassham, A. Amores, and W.A Cresko, 2013 Stacks: an  
602 analysis tool set for population genomics. *Molecular ecology* 22: 3124–3140.
- 603 Corbett-Detig, R.B., D.L. Hartl, and T.B. Sackton, 2015 Natural Selection Constrains Neutral  
604 Diversity across A Wide Range of Species. *PLOS Biol* 13: e1002112.
- 605 Crête-Lafrenière, A., L.K. Weir, and L. Bernatchez, 2012 Framing the Salmonidae Family  
606 Phylogenetic Portrait: A More Complete Picture from Increased Taxon Sampling.  
607 *PLOS ONE* 7: e46662.
- 608 Dukić, M., D. Berner, M. Roesti, C.R. Haag, and D. Ebert, 2016 A high-density genetic map  
609 reveals variation in recombination rate across the genome of *Daphnia magna*. *BMC*  
610 *Genetics* 17: 137.

- 611 Ekblom, R., and J. Galindo, 2011 Applications of next generation sequencing in molecular  
612 ecology of non-model organisms. *Heredity* 107: 1–15.
- 613 Elliott, J.M., 1994 *Quantitative Ecology and the Brown Trout*. Oxford University Press, USA.
- 614 Everett, M.V., M.R. Miller, and J.E. Seeb 2012 Meiotic maps of sockeye salmon derived from  
615 massively parallel DNA sequencing. *BMC Genomics* 13: 521.
- 616 Gagnaire, P.-A., E. Normandeau, S.A. Pavey, and L. Bernatchez, 2013a Mapping phenotypic,  
617 expression and transmission ratio distortion QTL using RAD markers in the Lake  
618 Whitefish (*Coregonus clupeaformis*). *Mol Ecol* 22: 3036–3048.
- 619 Gagnaire, P.-A., S.A. Pavey, E. Normandeau, and L. Bernatchez, 2013b The Genetic  
620 Architecture of Reproductive Isolation During Speciation-with-Gene-Flow in Lake  
621 Whitefish Species Pairs Assessed by Rad Sequencing. *Evolution* 67: 2483–2497.
- 622 Garcia de Léaniz, C., and E. Verspoor, 1989 Natural hybridization between Atlantic salmon,  
623 *Salmo salar*, and brown trout, *Salmo trutta*, in northern Spain. *J. Fish Biol* 34: 41–46.
- 624 Gharbi, K., A. Gautier, R.G. Danzmann, S. Gharbi, T. Sakamoto *et al.*, 2006 A linkage map  
625 for brown trout (*Salmo trutta*): chromosome homeologies and comparative genome  
626 organization with other salmonid fish. *Genetics* 172: 2405–2419.
- 627 Gonen, S., N.R. Lowe, T. Cezard, K. Gharbi, S.C. Bishop, *et al.*, 2014 Linkage maps of the  
628 Atlantic salmon (*Salmo salar*) genome derived from RAD sequencing. *BMC genomics*  
629 15: 1.
- 630 Hansen, M.M., K. Meier, and K.L.D Mensberg, 2010 Identifying footprints of selection in  
631 stocked brown trout populations: a spatio-temporal approach. *Molecular Ecology* 19:  
632 1787–1800.
- 633 Hansen, M.M., and K.L.D Mensberg, 2009 Admixture analysis of stocked brown trout  
634 populations using mapped microsatellite DNA markers: indigenous trout persist in  
635 introgressed populations. *Biology Letters* 5: 656–659.

- 636 Hansen, M.M., D.E. Ruzzante, E.E. Nielsen, and K.D. Mensberg, 2000 Microsatellite and  
637 mitochondrial DNA polymorphism reveals life-history dependent interbreeding  
638 between hatchery and wild brown trout (*Salmo trutta* L.). *Molecular Ecology* 9: 583–  
639 594.
- 640 Hecht, B.C., F.P. Thrower, M.C. Hale, M.R. Miller, and K.M. Nichols, 2012 Genetic  
641 Architecture of Migration-Related Traits in Rainbow and Steelhead Trout,  
642 *Oncorhynchus mykiss*. *G3*. 2: 1113–1127.
- 643 Hohenlohe, P.A., S.J. Amish, J.M. Catchen, F.W. Allendorf, and G. Luikart, 2011 Next-  
644 generation RAD sequencing identifies thousands of SNPs for assessing hybridization  
645 between rainbow and westslope cutthroat trout. *Molecular ecology resources* 11: 117–  
646 122.
- 647 Houston, R.D., J.W. Davey, S.C. Bishop, N.R. Lowe, J.C. Mota-Velasco, *et al.*, 2012  
648 Characterisation of QTL-linked and genome-wide restriction site-associated DNA  
649 (RAD) markers in farmed Atlantic salmon. *BMC Genomics* 13: 244.
- 650 Houston, R.D., J.B. Taggart, T. Cézard, M. Bekaert, N.R. Lowe, *et al.*, 2014 Development  
651 and validation of a high density SNP genotyping array for Atlantic salmon (*Salmo*  
652 *salar*). *BMC genomics* 15, 90.
- 653 Jensen, L.F., M.M. Hansen, J. Carlsson, V. Loeschcke, and K.L.D. Mensberg, 2005 Spatial  
654 and temporal genetic differentiation and effective population size of brown trout  
655 (*Salmo trutta*, L.) in small Danish rivers. *Conserv Genet* 6: 615–621.
- 656 Jones, J. w., 1947 Salmon and Trout Hybrids. *Proceedings of the Zoological Society of*  
657 *London* 117: 708–715.
- 658 Jorde, P.E., and N. Ryman, 1996 Demographic Genetics of Brown Trout (*Salmo trutta*) and  
659 Estimation of Effective Population Size From Temporal Change of Allele  
660 Frequencies. *Genetics* 143: 1369–1381.

- 661 Kai, W., K. Nomura, A. Fujiwara, Y. Nakamura, M. Yasuike, *et al.*, 2014 A ddRAD-based  
662 genetic map and its integration with the genome assembly of Japanese eel (*Anguilla*  
663 *japonica*) provides insights into genome evolution after the teleost-specific genome  
664 duplication. *BMC Genomics* 15: 233.
- 665 Kodama, M., M.S.O Briec, R.H. Devlin, J.J. Hard, and K.A. Naish, 2014 Comparative  
666 Mapping Between Coho Salmon (*Oncorhynchus kisutch*) and Three Other Salmonids  
667 Suggests a Role for Chromosomal Rearrangements in the Retention of Duplicated  
668 Regions Following a Whole Genome Duplication Event. *G3* 4: 1717–1730.
- 669 Kai, W., K. Nomura, A. Fujiwara, Y. Nakamura, M. Yasuike, *et al.*, 2014 A ddRAD-based  
670 genetic map and its integration with the genome assembly of Japanese eel (*Anguilla*  
671 *japonica*) provides insights into genome evolution after the teleost-specific genome  
672 duplication. *BMC Genomics* 15: 233.
- 673 Kuang, Y.-Y., X.-H Zheng, C.-Y. Li, X.-M Li, D.-C. Cao, *et al.*, 2016 The genetic map of  
674 goldfish (*Carassius auratus*) provided insights to the divergent genome evolutions in  
675 the Cyprinidae family. *Scientific Reports* 6.
- 676 Kumar, G., and M. Kocour, 2017 Applications of next-generation sequencing in fisheries  
677 research: A review. *Fisheries Research* 186: 11–22.
- 678 Lamaze, F.C., C. Sauvage, A. Marie, D. Garant, and L. Bernatchez, 2012 Dynamics of  
679 introgressive hybridization assessed by SNP population genomics of coding genes in  
680 stocked brook charr (*Salvelinus fontinalis*). *Molecular Ecology* 21: 2877–2895.
- 681 Largiader, C.R., and A. Scholl, 1996 Genetic introgression between native and introduced  
682 brown trout *Salmo trutta* L. populations in the Rhone River Basin. *Molecular Ecology*  
683 5: 417–426.
- 684 Larson, W.A., G.J. McKinney, M.T. Limborg, M.V. Everett, M.V., L.W. Seeb, L.W *et al.*,  
685 2016 Identification of Multiple QTL Hotspots in Sockeye Salmon (*Oncorhynchus*

- 686           *nerka*) Using Genotyping-by-Sequencing and a Dense Linkage Map. *Journal of*  
687           *Heredity* 107: 122–133.
- 688   Larson, W.A., L.W. Seeb, M.V. Everett, R.K. Waples, W.D. Templin, *et al.*, 2014  
689           Genotyping by sequencing resolves shallow population structure to inform  
690           conservation of Chinook salmon (*Oncorhynchus tshawytscha*). *Evolutionary*  
691           *Applications* 7 : 355–369.
- 692   Leitwein, M., P.A. Gagnaire, E. Desmarais, S. Guendouz, M. Rohmer, *et al.*, 2016 Genome-  
693           wide nucleotide diversity of hatchery-reared Atlantic and Mediterranean strains of  
694           brown trout *Salmo trutta* compared to wild Mediterranean populations. *J. Fish. Biol.*  
695           89: 2717–2734.
- 696   Lien, S., B.F. Koop, S.R. Sandve, J.R. Miller, M.P. Kent, *et al.*, 2016 The Atlantic salmon  
697           genome provides insights into rediploidization. *Nature* 533: 200–205.
- 698   Li, H., and R. Durbin, 2010 Fast and accurate long-read alignment with Burrows–Wheeler  
699           transform. *Bioinformatics* 26: 589–595.
- 700   Limborg, M.T., G.J. McKinney, L.W. Seeb, and J.E Seeb, 2015a. Recombination patterns  
701           reveal information about centromere location on linkage maps. *Mol. Ecol. Resour.* 16:  
702           655–661.
- 703   Limborg, M.T., Waples, R.K., Allendorf, F.W., Seeb, J.E., 2015b Linkage Mapping Reveals  
704           Strong Chiasma Interference in Sockeye Salmon: Implications for Interpreting  
705           Genomic Data. *G3.* 5: 2463–2473.
- 706   Limborg, M.T., Waples, R.K., Seeb, J.E., Seeb, L.W., 2014. Temporally Isolated Lineages of  
707           Pink Salmon Reveal Unique Signatures of Selection on Distinct Pools of Standing  
708           Genetic Variation. *J. Hered.* esu063.

- 709 Liu, S., Y. Li, Z. Qin, X. Geng, L. Bao, *et al.*, 2016 High-density interspecific genetic linkage  
710 mapping provides insights into genomic incompatibility between channel catfish and  
711 blue catfish. *Animal genetics* 47: 81–90.
- 712 Macqueen, D.J., and I.A. Johnston, 2014 A well-constrained estimate for the timing of the  
713 salmonid whole genome duplication reveals major decoupling from species  
714 diversification. *Proceedings of the Royal Society of London B: Biological Sciences*  
715 281: 20132881.
- 716 Martinez, P., A. Vinas, C. Bouza, J. Arias, R. Amaro, *et al.*, 1991 Cytogenetical  
717 characterization of hatchery stocks and natural populations of sea and brown trout  
718 from northwestern Spain. *Heredity* 66: 9–17.
- 719 May, B., and M.E. Delany, 2015 Meiotic Models to Explain Classical Linkage,  
720 Pseudolinkage, and Chromosomal Pairing in Tetraploid Derivative Salmonid  
721 Genomes: II. Wright is Still Right. *J Hered* 106: 762–766.
- 722 McKinney, G., L. Seeb, W. Larson, D. Gomez-Uchida, M. Limborg, M., *et al.*, 2015 An  
723 integrated linkage map reveals candidate genes underlying adaptive variation in  
724 Chinook salmon (*Oncorhynchus tshawytscha*). *Mol Ecol Resour* 16: 769–783.
- 725 McMeel, O.M., E.M. Hoey, and A. Ferguson, 2001 Partial nucleotide sequences, and routine  
726 typing by polymerase chain reaction–restriction fragment length polymorphism, of the  
727 brown trout (*Salmo trutta*) lactate dehydrogenase, LDH-C1\*90 and \*100 alleles.  
728 *Molecular Ecology* 10: 29–34.
- 729 Morrison, W.J., 1970 Nonrandom segregation of two lactate dehydrogenase subunit loci in  
730 trout. *Transactions of the American Fisheries Society* 99: 193–206.
- 731 Near, T.J., R.I. Eytan, A. Dornburg, K.L. Kuhn, J.A. Moore, *et al.*, 2012 Resolution of ray-  
732 finned fish phylogeny and timing of diversification. *PNAS* 109: 13698–13703.

- 733 Ohno, S., 1970 The Enormous Diversity in Genome Sizes of Fish as a Reflection of Nature's  
734 Extensive Experiments with Gene Duplication. Transactions of the American  
735 Fisheries Society 99: 120–130.
- 736 Palm, S., L. Laikre, P.E. Jorde, and N. Ryman, 2003 Effective population size and temporal  
737 genetic change in stream resident brown trout (*Salmo trutta*, L.). Conservation  
738 Genetics 4: 249–264.
- 739 Perrier, C., V. Bourret, M.P. Kent, and L. Bernatchez, 2013 Parallel and nonparallel genome-  
740 wide divergence among replicate population pairs of freshwater and anadromous  
741 Atlantic salmon. Molecular Ecology 22: 5577–5593.
- 742 Peterson, B.K., J.N. Weber, E.H. Kay, H.S. Fisher, and H.E. Hoekstra, 2012 Double digest  
743 RADseq: an inexpensive method for de novo SNP discovery and genotyping in model  
744 and non-model species. PloS one 7: e37135.
- 745 Phillips, R.B., K.A. Keatley, M.R. Morasch, A.B. Ventura, K.P. Lubieniecki, *et al.*, 2009  
746 Assignment of Atlantic salmon (*Salmo salar*) linkage groups to specific  
747 chromosomes: conservation of large syntenic blocks corresponding to whole  
748 chromosome arms in rainbow trout (*Oncorhynchus mykiss*). BMC Genetics 10: 1.
- 749 Phillips, R., and P. Ráb, 2001 Chromosome evolution in the Salmonidae (Pisces): an update.  
750 Biological Reviews of the Cambridge Philosophical Society 76: 1–25.
- 751 Poteaux, C., D. Beaudou, and P. Berrebi, 1998 Temporal variations of genetic introgression in  
752 stocked brown trout populations. Journal of Fish Biology 53: 701–713.
- 753 Poteaux, C., F. Bonhomme, and P. Berrebi, 1999 Microsatellite polymorphism and genetic  
754 impact of restocking in Mediterranean brown trout (*Salmo trutta* L.). Heredity 82:  
755 645–653.
- 756 Racimo, F., S. Sankararaman, R. Nielsen, and E. Huerta-Sánchez, 2015. Evidence for archaic  
757 adaptive introgression in humans. Nat Rev Genet 16, 359–371. doi:10.1038/nrg3936



- 758 Rezvoy, C., D. Charif, L. Guéguen, and G.A. Marais, 2007 MareyMap: an R-based tool with  
759 graphical interface for estimating recombination rates. *Bioinformatics* 23: 2188–2189.
- 760 Rondeau, E.B., D.R. Minkley, J.S. Leong, A.M. Messmer, J.R. Jantzen, *et al.*, 2014 The  
761 Genome and Linkage Map of the Northern Pike (*Esox lucius*): Conserved Synteny  
762 Revealed between the Salmonid Sister Group and the Neoteleostei. *PLOS ONE* 9:  
763 e102089.
- 764 Sanz, N., M. Cortey, C. Pla, and J.L. García-Marín, 2006 Hatchery introgression blurs ancient  
765 hybridization between brown trout (*Salmo trutta*) lineages as indicated by  
766 complementary allozymes and mtDNA markers. *Biological Conservation* 130: 278–  
767 289.
- 768 Sauvage, C., M. Vagner, N. Derôme, C. Audet, and L. Bernatchez, 2012 Coding gene single  
769 nucleotide polymorphism mapping and quantitative trait loci detection for  
770 physiological reproductive traits in brook charr, *Salvelinus fontinalis*. *G3*: 2: 379–392.
- 771 Serbezov, D., P.E. Jorde, L. Bernatchez, E.M. Olsen, and L.A. Vøllestad, 2012 Life history  
772 and demographic determinants of effective/census size ratios as exemplified by brown  
773 trout (*Salmo trutta*). *Evolutionary Applications* 5: 607–618.
- 774 Slate, J., J. Gratten, D. Beraldi, J. Stapley, M. Hale, *et al.*, 2008 Gene mapping in the wild  
775 with SNPs: guidelines and future directions. *Genetica* 136: 97–107.
- 776 Stapley, J., J. Reger, P.G.D. Feulner, C. Smadja, J. Galindo, *et al.*, 2010 Adaptation  
777 genomics: the next generation. *Trends in Ecology & Evolution* 25: 705–712.
- 778 Sutherland, B.J.G., T. Gosselin, E. Normandeau, M. Lamothe, N. Isabel, *et al.*, 2016  
779 Salmonid chromosome evolution as revealed by a novel method for comparing  
780 RADseq linkage maps. *Genome Biol Evol* evw262. doi:10.1093/gbe/evw262

- 781 Thaulow, J., R. Borgstrøm, and M. Heun, 2014 Genetic persistence of an initially introduced  
782 brown trout (*Salmo trutta L.*) population despite restocking of foreign conspecifics.  
783 *Ecol Freshw Fish* 23: 485–497.
- 784 Tsai, H.Y., A. Hamilton, D.R. Guy, A.E. Tinch, S.C. Bishop, *et al.*, 2015 The genetic  
785 architecture of growth and fillet traits in farmed Atlantic salmon (*Salmo salar*). *Bmc*  
786 *Genetics* 16: 51.
- 787 Tsai, H.Y., D. Robledo, N.R. Lowe, M. Bekaert, J.B. Taggart, *et al.*, 2016 Construction and  
788 Annotation of a High Density SNP Linkage Map of the Atlantic Salmon (*Salmo salar*)  
789 Genome. *G3*. 6: 2173–2179.
- 790 Van Ooijen, J.W., 2006 JoinMap 4; Software for the calculation of genetic map in  
791 experimental populations. Kyazma B.V., Wageningen, Netherlands.
- 792 Wang, L., Z.Y. Wan, B. Bai, S.Q. Huang, E. Chua, *et al.*, 2015 Construction of a high-density  
793 linkage map and fine mapping of QTL for growth in Asian seabass. *Sci. Rep.* 5.
- 794 Waples, R.K., L.W. Seeb, and J.E. Seeb, 2016 Linkage mapping with paralogs exposes  
795 regions of residual tetrasomic inheritance in chum salmon (*Oncorhynchus keta*). *Mol.*  
796 *Ecol. Res.* 16: 17–28.
- 797 Wright Jr, J.E., K. Johnson, A. Hollister, B. May, 1983 Meiotic models to explain classical  
798 linkage, pseudolinkage, and chromosome pairing in tetraploid derivative salmonid  
799 genomes. *Isozymes* 10: 239–260.
- 800 Yano, A., B. Nicol, E. Jouanno, E. Quillet, A. Fostier, *et al.*, 2013 The sexually dimorphic on  
801 the Y-chromosome gene (sdY) is a conserved male-specific Y-chromosome sequence  
802 in many salmonids. *Evolutionary applications* 6: 486–496.
- 803 Zhao, L., Y. Zhang, P. Ji, X. Zhang, Z. Zhao, *et al.*, 2013 A Dense Genetic Linkage Map for  
804 Common Carp and Its Integration with a BAC-Based Physical Map. *PLOS ONE* 8:  
805 e63928

**Table 1:** Summary of the main features of the brown trout high density linkage map based on the 3,977 mapped markers, including correspondence with the former generation linkage map established by Gharbi et al. (2006). The mean recombination rate is reported for each LG, as well as syntenic relationships with homologous chromosome arms from Atlantic salmon and brook charr. Grey-shaded arms correspond to the seven pairs involved in homeologous pairing (i.e. tetrasomic inheritance) in *S. salar* (Lien et al. 2016).

| LG            | Distance (cM) | Number of SNP markers mapped to each LG | density (markers/cM) | Recombination rate (cM/Mb) | Microsatellite LG_Map Gharbi et al. (2006) | Atlantic Salmon      | Brook Charr          |
|---------------|---------------|-----------------------------------------|----------------------|----------------------------|--------------------------------------------|----------------------|----------------------|
| <b>Str 1</b>  | 46.308        | 252                                     | 5.44                 | 1.43                       | BT-10                                      | Ssa 16qb             | Sfon 05a             |
|               |               |                                         |                      |                            | BT-06                                      | Ssa 29               | Sfon 05b             |
| <b>Str 2</b>  | 45.621        | 130                                     | 2.85                 | 0.82                       | BT-05                                      | Ssa 7q               | Sfon 02b             |
|               |               |                                         |                      |                            | BT-15                                      | Ssa 7p               | Sfon 02a             |
| <b>Str 3</b>  | 14.635        | 47                                      | 3.21                 | 0.39                       | BT-16<br>BT-24                             | Ssa 3q               | Sfon 08a             |
| <b>Str 4</b>  | 20.902        | 249                                     | 11.91                | 0.4                        | BT-32                                      | Ssa 20qa             | Sfon 40              |
| <b>Str 5</b>  | 40.51         | 140                                     | 3.46                 | 0.56                       | BT-6                                       | Ssa 6q               | Sfon 31              |
|               |               |                                         |                      |                            | BT-35                                      | Ssa 6p               | Sfon 14              |
| <b>Str 6</b>  | 53.049        | 139                                     | 2.62                 | 0.48                       | BT-27                                      | Ssa 12qa<br>Ssa 12qb | Sfon 03b<br>Sfon 03a |
|               |               |                                         |                      |                            | BT-9                                       | Ssa 25               | Sfon 24              |
| <b>Str 7</b>  | 28.088        | 102                                     | 3.63                 | 0.7                        | BT-9                                       | Ssa 25               | Sfon 24              |
| <b>Str 8</b>  | 19.814        | 96                                      | 4.85                 | 0.89                       | -                                          | Ssa 17qa             | Sfon 39              |
| <b>Str 9</b>  | 44.687        | 88                                      | 1.97                 | 1.18                       | BT-13                                      | Ssa 1p               | Sfon 12              |
| <b>Str 10</b> | 32.513        | 85                                      | 2.61                 | 0.68                       | BT-27                                      | Ssa 13qb             | Sfon 08b             |
| <b>Str 11</b> | 65.086        | 79                                      | 1.21                 | 1.65                       | BT-12                                      | Ssa 5q<br>Ssa 5p     | Sfon 07a<br>Sfon 07b |
|               |               |                                         |                      |                            | -                                          | Ssa 2p               | Sfon 29              |
| <b>Str 12</b> | 33.021        | 60                                      | 1.82                 | 0.7                        | -                                          | Ssa 2p               | Sfon 29              |
| <b>Str 13</b> | 28.807        | 64                                      | 2.22                 | 0.36                       | -                                          | Ssa 26               | Sfon 06a             |
| <b>Str 14</b> | 47.143        | 61                                      | 1.29                 | 1.23                       | BT-36                                      | Ssa 28               | Sfon 27              |
| <b>Str 15</b> | 29.805        | 59                                      | 1.98                 | 1.6                        | BT-04                                      | Ssa 4p<br>Ssa 23     | Sfon04b<br>Sfon 04a  |
|               |               |                                         |                      |                            | -                                          | Ssa 1qb              | Sfon 13              |
| <b>Str 16</b> | 29.837        | 56                                      | 1.88                 | 0.59                       | -                                          | Ssa 1qb              | Sfon 13              |
| <b>Str 17</b> | 40.655        | 24                                      | 0.59                 | 1.13                       | BT-28                                      | Ssa 15qb             | Sfon 30              |
| <b>Str 18</b> | 25.58         | 207                                     | 8.09                 | 0.5                        | BT-16                                      | Ssa 3p               | Sfon 11              |
| <b>Str 19</b> | 34.485        | 69                                      | 2                    | 1.04                       | BT-22                                      | Ssa 24               | Sfon 06b             |
| <b>Str 20</b> | 23.814        | 60                                      | 2.52                 | 0.65                       | -                                          | Ssa 2q               | Sfon 42              |
| <b>Str 21</b> | 42.194        | 187                                     | 4.43                 | 1.43                       | BT-25                                      | Ssa 16qa             | Sfon 20              |
| <b>Str 22</b> | 30.433        | 145                                     | 4.76                 | 0.6                        | BT-30                                      | Ssa 4q               | Sfon 09              |
|               |               |                                         |                      |                            | BT-02                                      | Ssa 9qb<br>Ssa 9qc   | Sfon 33<br>Sfon 38   |
| <b>Str 23</b> | 38.057        | 141                                     | 3.7                  | 0.5                        | BT-02                                      | Ssa 9qb<br>Ssa 9qc   | Sfon 33<br>Sfon 38   |
| <b>Str 24</b> | 37.805        | 139                                     | 3.68                 | 1.11                       | BT-31                                      | Ssa 21               | Sfon 26              |
| <b>Str 25</b> | 23.843        | 131                                     | 5.49                 | 0.63                       | BT-07                                      | Ssa 10qb             | Sfon 15              |
| <b>Str 26</b> | 41.025        | 113                                     | 2.75                 | 0.45                       | BT-33                                      | Ssa 22               | Sfon 21              |
| <b>Str 27</b> | 33.275        | 111                                     | 3.34                 | 0.21                       | BT-26                                      | Ssa 13qa             | Sfon 18              |
| <b>Str 28</b> | 35.425        | 109                                     | 3.08                 | 1.05                       | BT-23                                      | Ssa 18qa             | Sfon 36              |

|                     |                |             |             |             |                |                      |                     |
|---------------------|----------------|-------------|-------------|-------------|----------------|----------------------|---------------------|
|                     |                |             |             |             |                | Ssa 18qb             | Sfon32              |
| <b>Str 29</b>       | 36.675         | 105         | 2.86        | 0.52        | BT-29          | Ssa 27               | Sfon 23             |
| <b>Str 30</b>       | 21.4           | 102         | 4.77        | 0.37        | BT-23          | Ssa 1qa              | Sfon 01b            |
| <b>Str 31</b>       | 24             | 99          | 4.13        | 1.33        | BT-02          | Ssa 9qa              | Sfon 35             |
| <b>Str 32</b>       | 39.782         | 87          | 2.19        | 0.81        | -              | Ssa 14qa             | Sfon 22             |
| <b>Str 33</b>       | 20.438         | 73          | 3.57        | 1.23        | -              | Ssa 8q               | Sfon 41             |
| <b>Str 34</b>       | 31.085         | 67          | 2.16        | 1.03        | BT-14          | Ssa 20qb             | Sfon 25             |
| <b>Str 35</b>       | 44.948         | 68          | 1.51        | 1.22        | BT-12<br>BT-35 | Ssa 10qa             | Sfon 17             |
| <b>Str 36</b>       | 42.241         | 61          | 1.44        | 0.44        | BT-13          | Ssa 11qa<br>Ssa 11qb | Sfon28<br>Sfon 10   |
| <b>Str 37</b>       | 84.844         | 63          | 0.74        | 4.1         | -              | Ssa 14qb             | Sfon34              |
| <b>Str 38</b>       | 19.365         | 49          | 2.53        | 1.57        | BT-15          | Ssa 17qb             | Sfon 37             |
| <b>Str 39</b>       | 36.825         | 37          | 1           | 1.08        | BT-28          | Ssa 15qa             | Sfon 19             |
| <b>Str 40</b>       | 15.12          | 23          | 1.52        | 0.58        | -              | Ssa 19qb<br>Ssa 19qa | Sfon 01a<br>Sfon 16 |
| <b>Whole genome</b> | <b>1403.14</b> | <b>3977</b> | <b>3.15</b> | <b>0.88</b> |                |                      |                     |

---

## Legends of the figures:

**Fig. 1.** The brown trout (*Salmo trutta*) high density linkage map. Horizontal black lines within each of the 40 LGs represent mapped RAD markers ( $n = 3,977$ ). The most probable chromosome type determined with the RFm method (Limborg et al. 2015a) is indicated above each LG (A: acrocentric, M: metacentric, U: undetermined). Green boxes indicate the approximate position of the centromere for metacentric LGs. Red dots represent the position of 89 additional markers that were transferred from the previous generation linkage map (see Table S2 for details).

**Fig. 2.** Plots illustrating the recombination frequency estimates (RFm) for intervals between markers along two different LGs. For each LG, RFm was calculated from both chromosomal extremities (right: red circles; left: blue circles), using each of the two terminal markers as a reference starting point. The RFm plot of (A) LG *str22* illustrates a classical acrocentric pattern, while (B) LG *str28* displays a classical metacentric pattern with a centromere position around 70 cM. The RFm plots of all brown trout LGs obtained in the two families are illustrated in Figure S1.

**Fig. 3.** Dual synteny plot showing conserved syntenic blocks and chromosome rearrangements between *Salmo salar* (*Ssa*) and *Salmo trutta* (*Str*) LGs. Chromosomes arms (p, q<sub>a</sub> and q<sub>b</sub>) are specified for *S. salar* LGs, and the seven pairs of chromosome arms that still exhibit residual tetrasomy in salmon appear in red (Lien et al., 2016).

**Fig. 4:** Summary of fission and fusion events within the *Salmo* genus, that were oriented using the brook charr (*Salvelinus fontinalis*) as an outgroup species. Rearrangements are classified with regards to their occurrence (a) before the *S. salar*/*S. trutta* speciation, (b) in the *S. salar* branch after speciation, or (c) in the *S. trutta* branch after speciation.

**Fig. 5.** Estimates of local recombination rate ( $\rho$ ) in cM/Mb for markers located along two *Salmo trutta* linkage groups: (A) LG *Str9* and (B) LG *Str23*. The average recombination rate (mean  $\rho$ ) for each LG is given at the top left side of each figure. Local recombination rate estimates for other *S. trutta* LGs are reported in Table S1 and the average recombination rate of each LG is provided in Table 1.

**Fig. 6.** Genome-wide positive correlation between the mean nucleotide diversity in the Atlantic brown trout lineage ( $\pi$ ) and the local recombination rate ( $\rho$ , in cM/Mb), based on 3,038 SNP markers ( $R^2 = 0.058$ ;  $p$ -value  $< 0.001$ ).

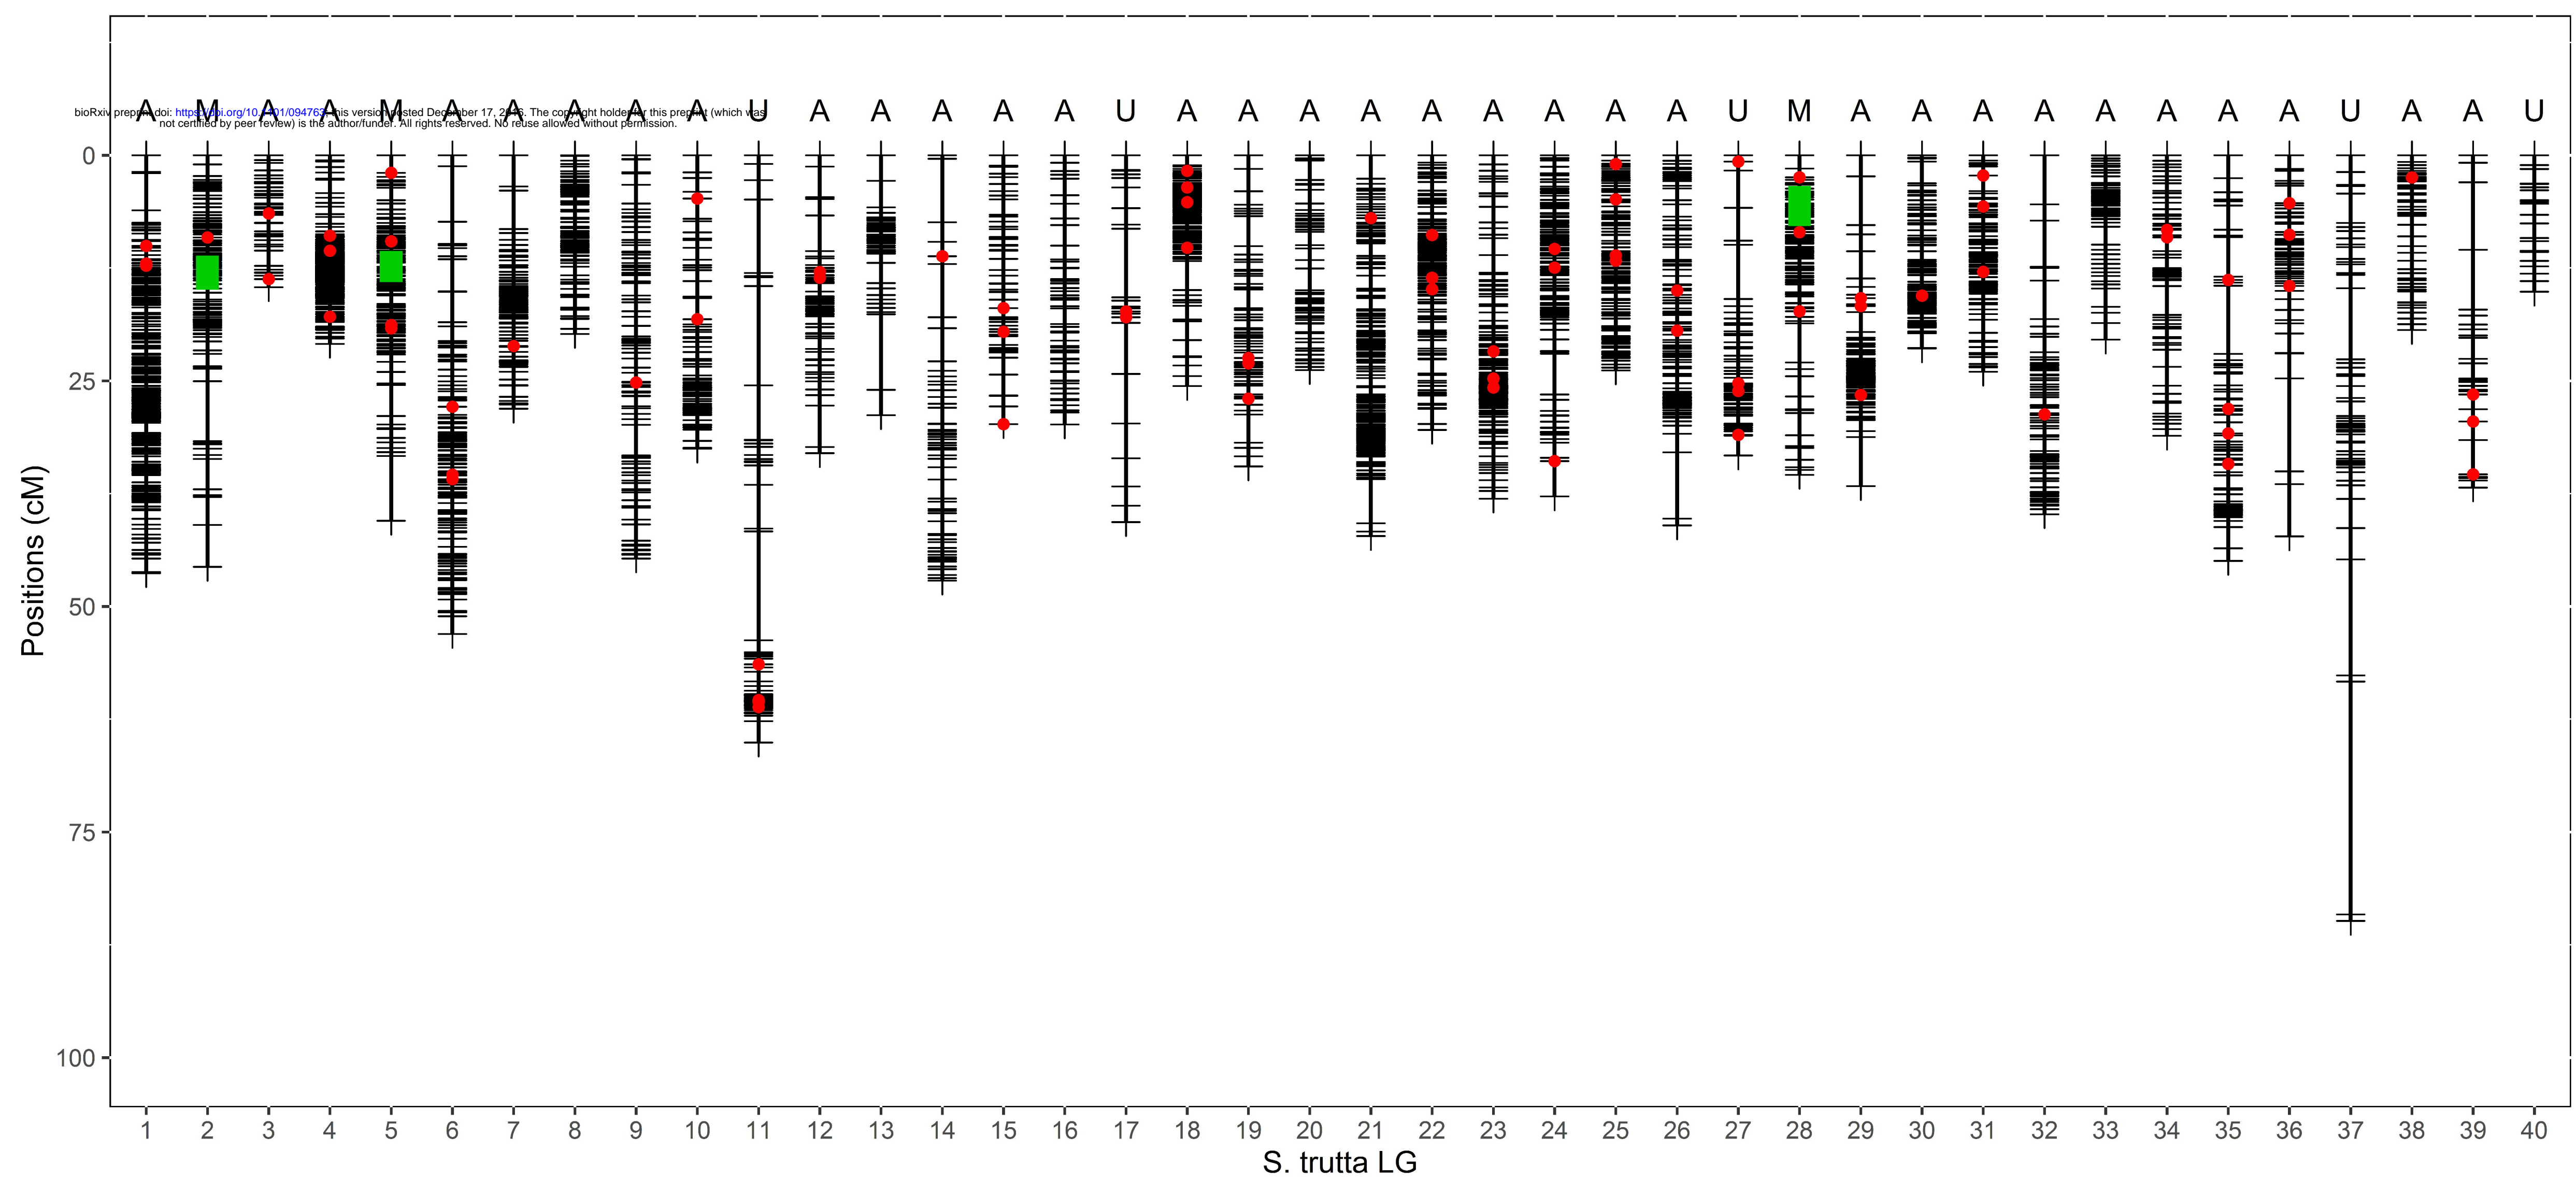

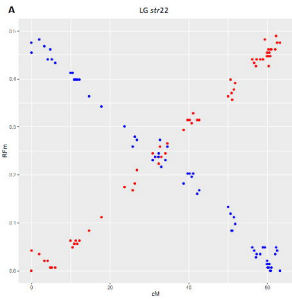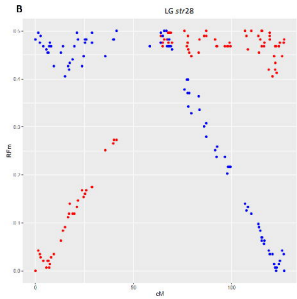





|                                            | Fusion | Fission |
|--------------------------------------------|--------|---------|
| a <b>Salmo before speciation</b>           | 5      | 3       |
| b <b><i>S. salar</i> after speciation</b>  | 13     | 2       |
| c <b><i>S. trutta</i> after speciation</b> | 0      | 0       |

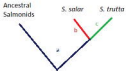

**A**LG *str9*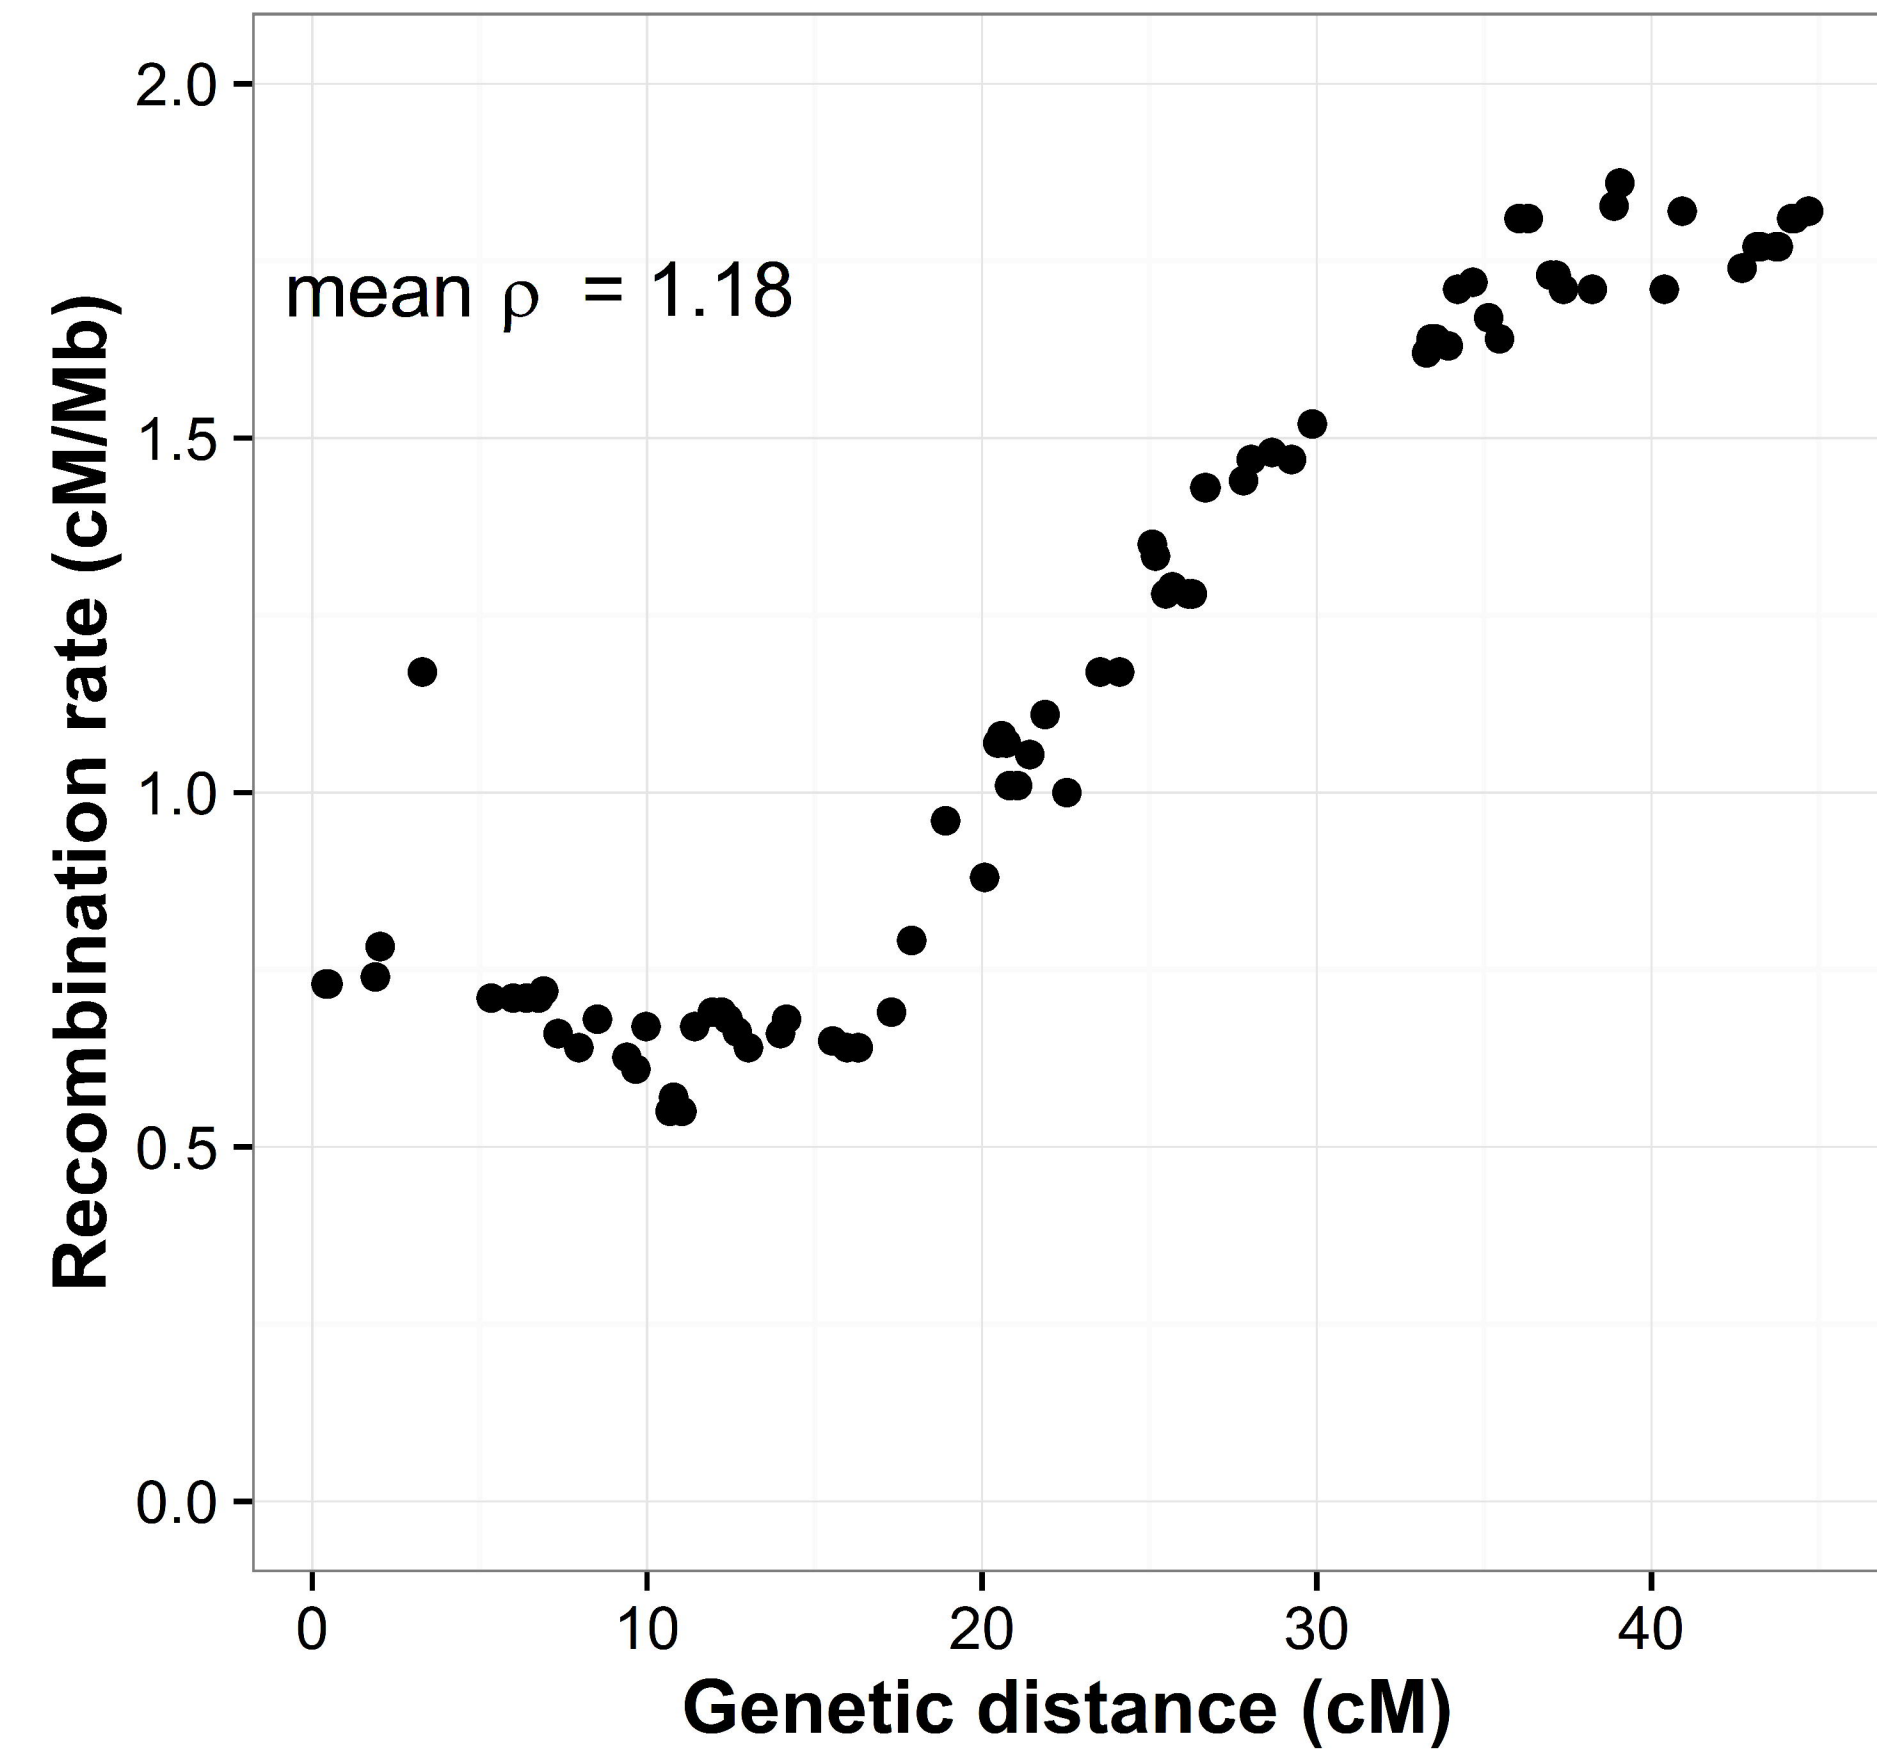**B**LG *str23*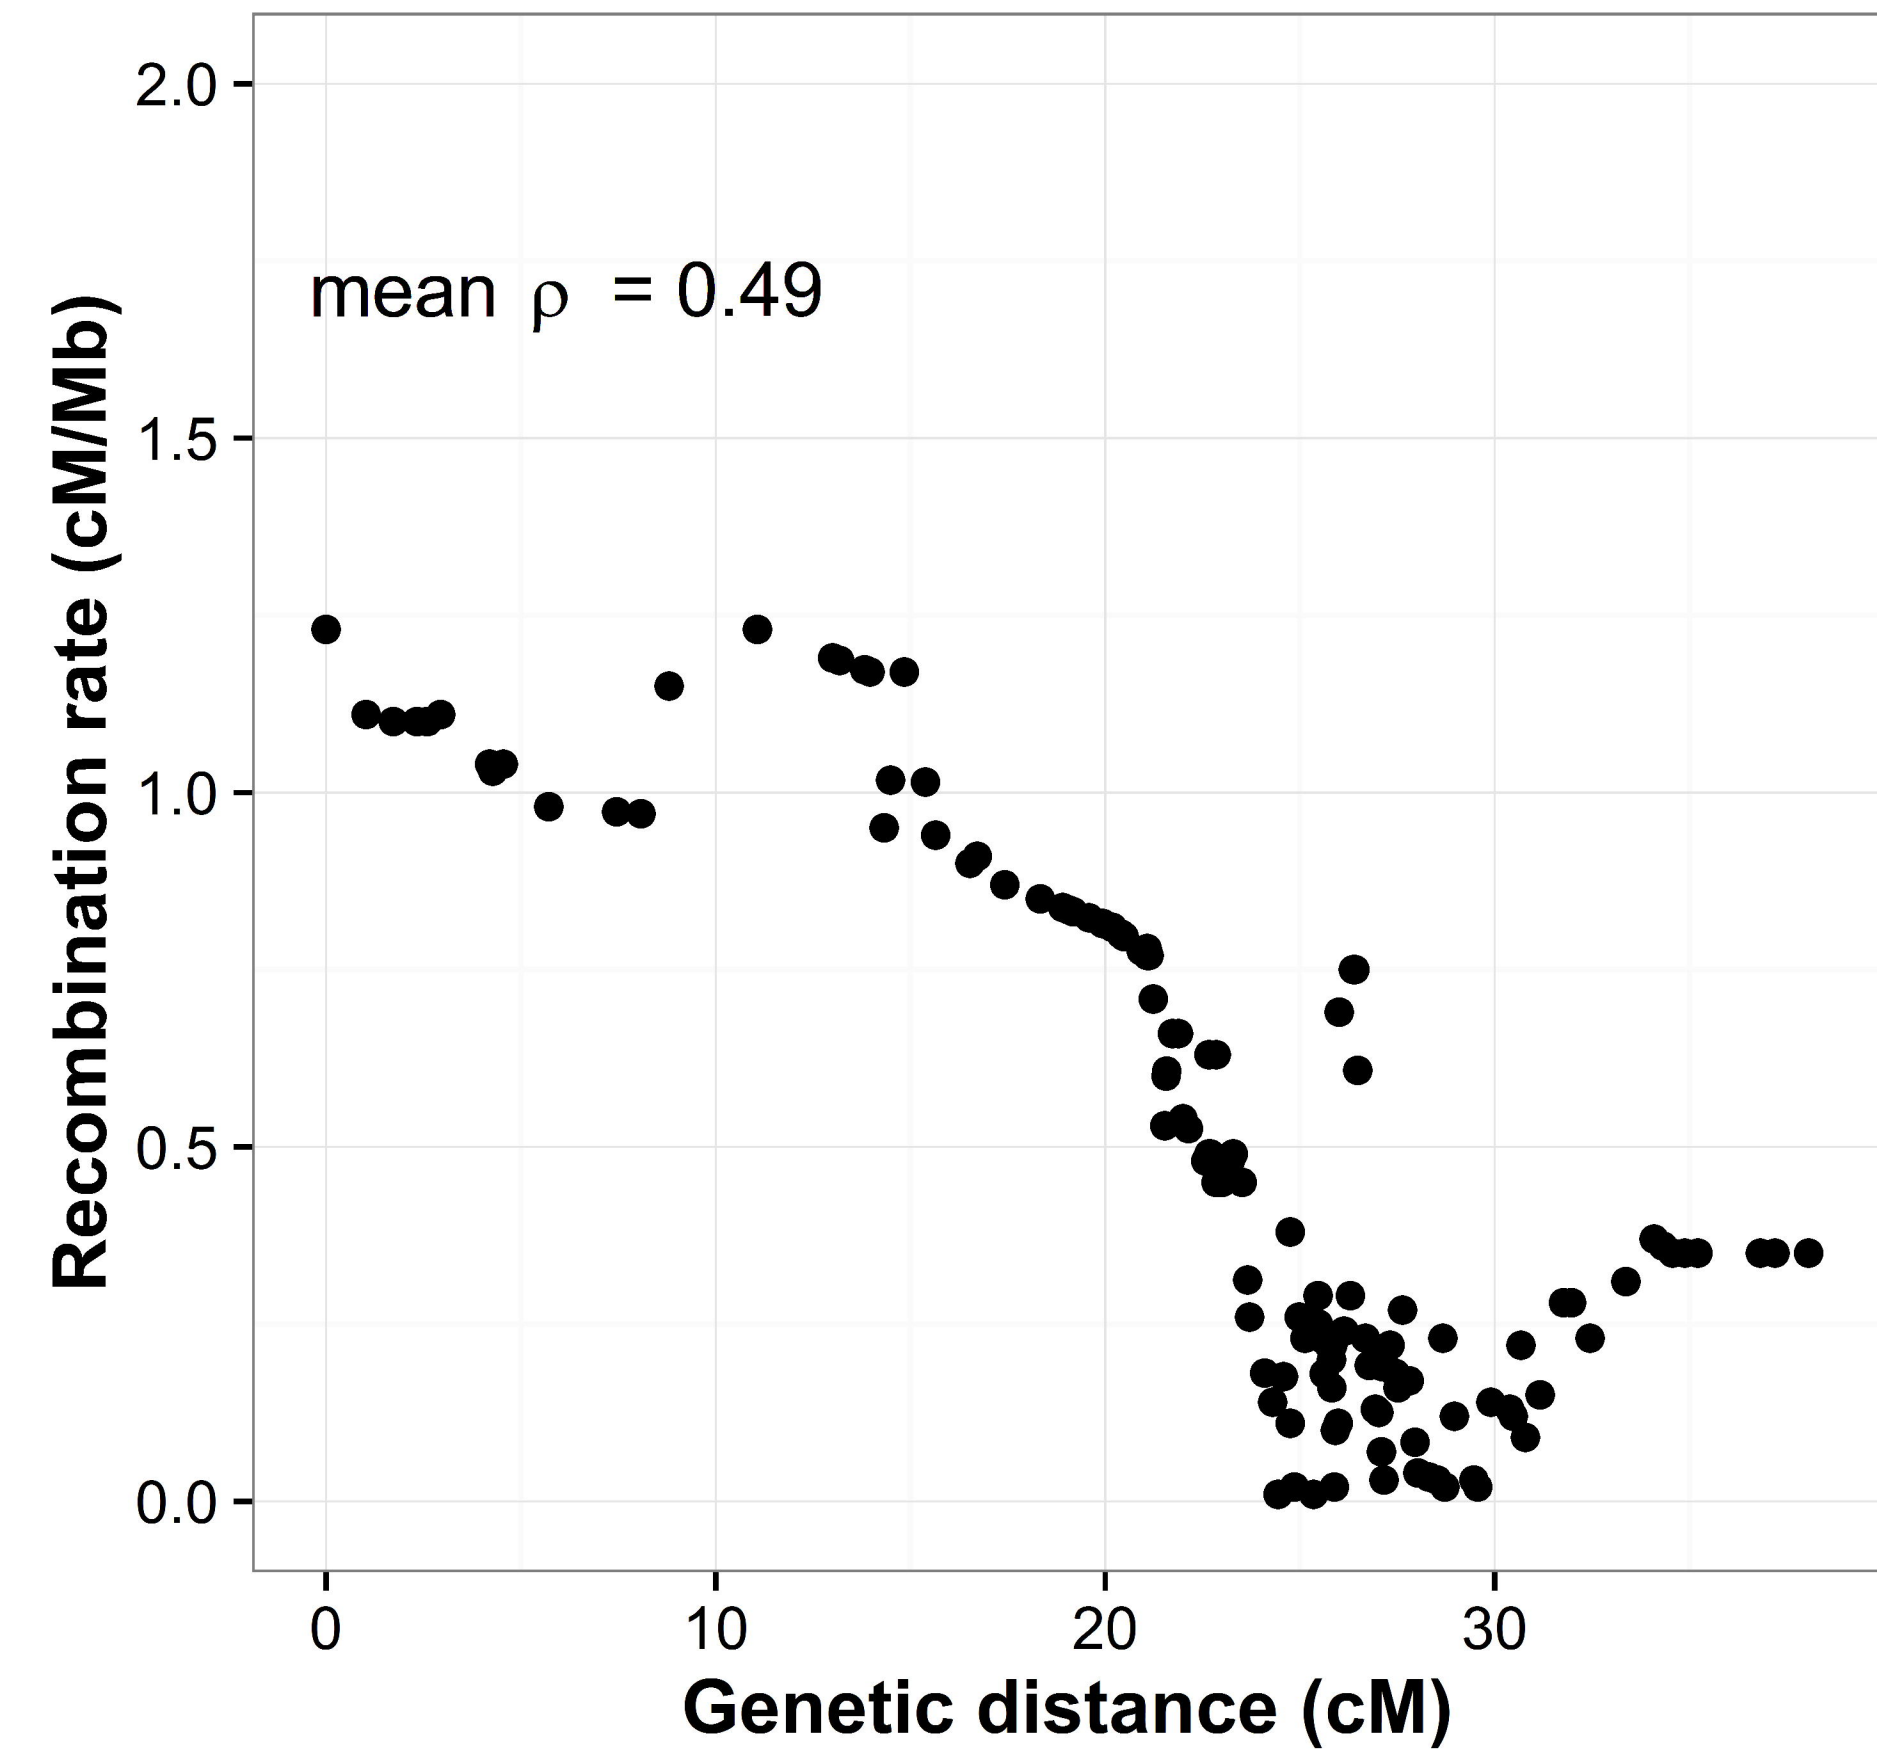

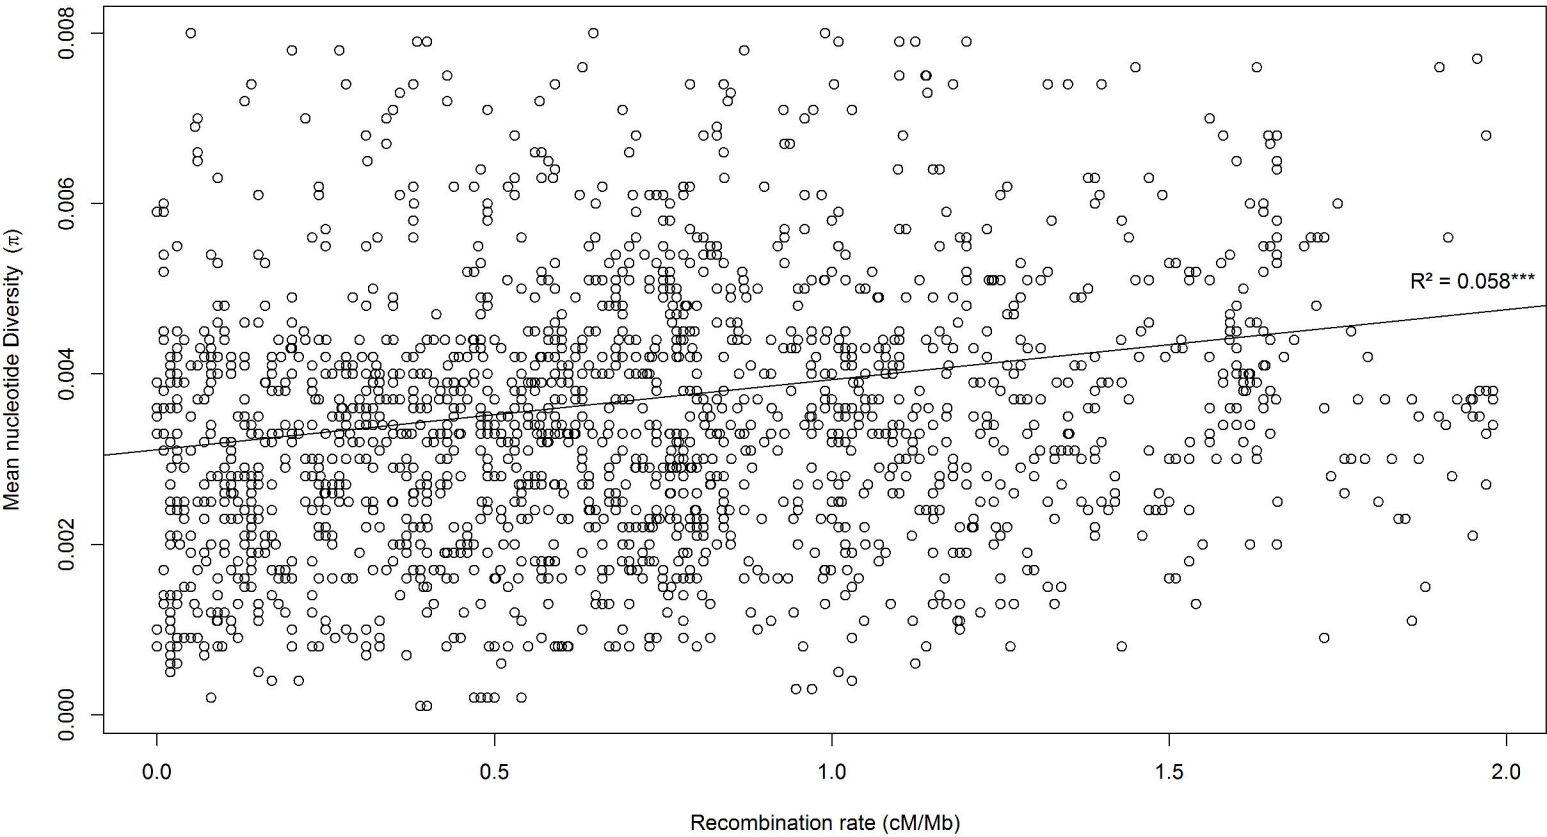

Source: http://biorxiv.org/content/10.1101/094763v1.full.pdf
